# Supplementary material for: Crystal structure and electronic properties of a thiolate-protected Au24 nanocluster
Source: Royal Society of Chemistry journal article supplement (doi:10.1039/c4nr01350f), 2014-01-01
Supplement: c4nr01350f1.pdf [file c4nr01350f1.pdf]

## Supplementary Information:

### 1. Experimental

**Synthesis and crystallization of Au<sub>24</sub>(SR)<sub>20</sub> (R = CH<sub>2</sub>Ph-<sup>t</sup>Bu).** The [Au<sub>23</sub>(S-*c*-C<sub>6</sub>H<sub>11</sub>)<sub>16</sub>]<sup>-</sup> nanocluster was used as the starting material for obtaining the [Au<sub>24</sub>(SCH<sub>2</sub>Ph-<sup>t</sup>Bu)<sub>20</sub>]<sup>0</sup> nanocluster via a ligand exchange reaction with HSCH<sub>2</sub>Ph-<sup>t</sup>Bu thiol. In a typical reaction, ~3 mg Au<sub>23</sub> clusters were dissolved in ~0.5 mL dichloromethane containing 0.5 mL HSCH<sub>2</sub>Ph-<sup>t</sup>Bu thiol. The mixture was stirred for 36 h at 40 °C under reflux conditions. The resulting nanocluster product was then washed with methanol several times and finally extracted with dichloromethane. Single crystal growth of the nanoclusters was performed by first dissolving ~2 mg [Au<sub>24</sub>(SCH<sub>2</sub>Ph-<sup>t</sup>Bu)<sub>20</sub>]<sup>0</sup> clusters in 0.5 mL dichloromethane, followed by vapour diffusion of pentane into the cluster solution for 1-2 days. ESI mass spectra of Au<sub>24</sub> clusters were recorded using a Waters Q-TOF mass spectrometer equipped with Z-spray source with source temperature kept at 70 °C. The cluster sample was directly infused into the chamber at 5 μL/min. The spray voltage was kept at 2.20 kV and the cone voltage at 60 V. To prepare the ESI sample, [Au<sub>24</sub>(SCH<sub>2</sub>Ph-<sup>t</sup>Bu)<sub>20</sub>]<sup>0</sup> clusters were dissolved in toluene (~1 mg/mL) and diluted (2:1 v) by dry ethanol containing 50 mM CsOAc to ionize the clusters by forming Cs<sup>+</sup>-cluster adducts.

**X-ray crystallographic determination of Au<sub>24</sub>(SR)<sub>20</sub>.** Single X-ray diffraction data of Au<sub>24</sub>(SR)<sub>20</sub> was collected on a Bruker X8 Prospector Ultra equipped with an Apex II CCD detector and an IμS micro-focus CuKα X-ray source (λ = 1.54178 Å). A piece of red rod-shaped crystal with dimensions 0.18 x 0.12 x 0.03 mm was mounted onto a MiTeGen micromount with fluorolube. The data were collected under room temperature (296 K).

A triclinic unit cell with dimensions a = 15.9929(8), b = 21.5942(12), c = 21.8042(11), α = 66.888(3)°, β = 74.051(3)°, and γ = 73.462(3)° was derived from the least-square refinement of 9411 reflections in the range of 2.27 < θ < 53.61. Centrosymmetric space group P-1 was determined based on mean |E\*E-1| statistic (1.048).

The data was collected to 0.95 Å. After integration of the data by Bruker program SAINT<sup>1</sup>, empirical absorption correction was applied using program SADABS<sup>1</sup>. Maximum and minimum transmittance (T<sub>max</sub>, T<sub>min</sub>) values are 0.5043 and 0.0873 respectively.

The structure was successfully solved with direct method using Bruker program SHELXTL.<sup>2</sup> All the Au, S, and some of the C atoms were located easily. Although most of the C atoms were generated via subsequent difference Fourier syntheses, some of the t-Bu carbons could not be found. In that case, three t-Bu benzene fragments were constrained as rigid model adapted from Cambridge database. In terms of other t-Bu benzene fragments, numerous restraints were applied to optimize the bond lengths, bond angles, and atomic displacement parameters. In particular, attempts to refine C119, C120, and C124 were not successful. This is probably due to either severe disorder or high absorption coefficient (μ<sub>u</sub>=26.44 mm<sup>-1</sup>). So they were left unrefined. Estimated atomic displacement parameters (0.4 or 0.5) were given. All the non-hydrogen atoms except t-Bu carbons were refined anisotropically. Idealized atom positions were calculated for all hydrogen atoms (with d-(C<sub>CH3</sub>-H) = 0.96 Å, d-(C<sub>aromatic</sub>-H)=0.93 Å, d-(C<sub>CH2</sub>-H)=0.97 Å). All the refinement parameters are summarized in Table S1.

1. APEX II software suite, Bruker-AXS (2006).

2. SHELXTL, G. M. Sheldrick, *Acta Crystallogr. A*, **64**, 112 (2008).

### 2. DFT Calculations

Density functional theory (DFT) calculations were performed with Au<sub>24</sub>(SCH<sub>3</sub>)<sub>20</sub> in which methanethiolate replaces the actual bulky ligand. Starting from the X-ray structures, we first carried out geometry optimization of the model clusters by freezing the Au<sub>24</sub>S<sub>20</sub> core structure while relaxing the structures of ligands. We calculated geometry optimization and analyzed electronic properties of the cluster without molecular symmetry. Geometry optimizations based on a quasi-Newton–Raphson method were carried out at the level of Kohn–Sham density functional theory (KS-DFT) employing the hybrid functional B3LYP for Au<sub>24</sub>(SCH<sub>3</sub>)<sub>20</sub>. Of note, we also compared PBE0 and B3LYP functionals for Au<sub>24</sub>(SCH<sub>3</sub>)<sub>20</sub> and found that the B3LYP functional gave a slightly closer match with the experimental

optical spectrum. The double- $\zeta$  valence quality plus polarization basis in the TURBOMOLE basis set library was adopted in the calculations along with a 60-electron relativistic effective core potentials for the gold atom. The absorption spectra were simulated within time-dependent KS linear response theory. All the calculations used the TURBOMOLE Ver. 6.3 package of ab initio quantum chemistry programs.

### 3. Supplementary Figures

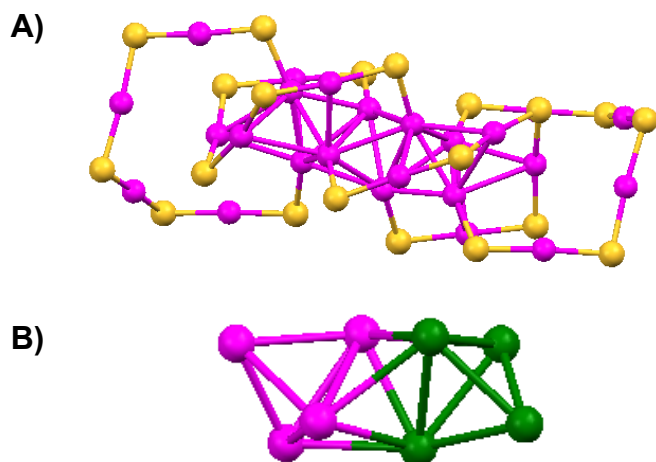

**Figure S1.** Theoretical structure (Iso 3) of  $\text{Au}_{24}(\text{SCH}_3)_{20}$ , (A) the  $\text{Au}_{24}\text{S}_{20}$  framework consisting of four tetrameric  $\text{Au}_4\text{S}_5$  staples and a  $\text{Au}_8$  kernel, (B) configuration of the  $\text{Au}_8$  kernel. (Coordinates were provided by Prof. Y. Pei).

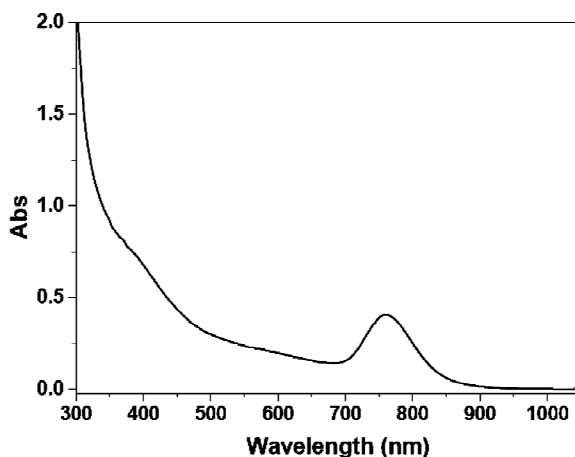

**Figure S2.** UV-Vis spectrum of  $[\text{Au}_{24}(\text{SCH}_2\text{CH}_2\text{Ph})_{20}]^0$  (ref 72, see main text).

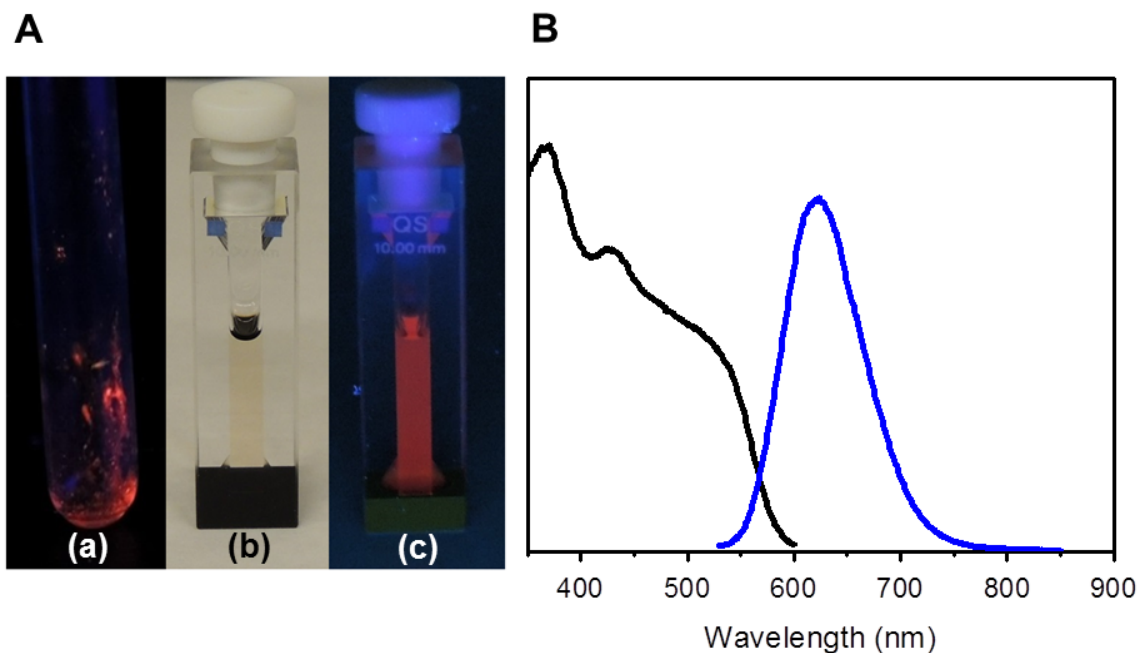

**Figure S3.** (A) Photoluminescence of  $\text{Au}_{24}(\text{SCH}_2\text{Ph-}t\text{-Bu})_{20}$  nanoclusters: (a) Solid  $\text{Au}_{24}$  crystals under UV light ( $\lambda = 365 \text{ nm}$ ) with red emission, (b) Photograph of a  $\sim 0.1$  OD (at 500 nm) solution of  $\text{Au}_{24}$  in toluene under visible light, (c) The same solution under under UV ( $\lambda = 365 \text{ nm}$ ). (B) Photoluminescence spectrum (blue curve) of  $\text{Au}_{24}$  in toluene (blue curve, excit.=514 nm, slit width: 5 nm, concentration: 0.08 OD absorbance at 514 nm measured by UV-vis) and the excitation spectrum (black curve) corresponding to the 618 nm emission band.

#### 4. Supplementary Tables for Au<sub>24</sub>(SR)<sub>20</sub> structural parameters

**Table S1.** Crystal data and structure refinement for Au<sub>24</sub>(SR)<sub>20</sub>.

|                                   |                                                                    |                 |
|-----------------------------------|--------------------------------------------------------------------|-----------------|
| Identification code               | Au <sub>24</sub> (SR) <sub>20</sub>                                |                 |
| Empirical formula                 | C <sub>220</sub> H <sub>300</sub> Au <sub>24</sub> S <sub>20</sub> |                 |
| Formula weight                    | 8313.00                                                            |                 |
| Temperature                       | 296(2) K                                                           |                 |
| Wavelength                        | 1.54178 Å                                                          |                 |
| Crystal system                    | Triclinic                                                          |                 |
| Space group                       | P -1                                                               |                 |
| Unit cell dimensions              | a = 15.9929(8) Å                                                   | α = 66.888(3)°. |
|                                   | b = 21.5942(12) Å                                                  | β = 74.051(3)°. |
|                                   | c = 21.8042(11) Å                                                  | γ = 73.462(3)°. |
| Volume                            | 6524.8(6) Å <sup>3</sup>                                           |                 |
| Z                                 | 1                                                                  |                 |
| Density (calculated)              | 2.116 Mg/m <sup>3</sup>                                            |                 |
| Absorption coefficient            | 26.437 mm <sup>-1</sup>                                            |                 |
| F(000)                            | 3836                                                               |                 |
| Crystal size                      | 0.18 x 0.12 x 0.03 mm <sup>3</sup>                                 |                 |
| Theta range for data collection   | 2.24 to 54.53°.                                                    |                 |
| Index ranges                      | -16 ≤ h ≤ 16, -22 ≤ k ≤ 22, -22 ≤ l ≤ 23                           |                 |
| Reflections collected             | 56832                                                              |                 |
| Independent reflections           | 15678 [R(int) = 0.0640]                                            |                 |
| Completeness to theta = 54.53°    | 97.4 %                                                             |                 |
| Absorption correction             | Multi scan (SADABS)                                                |                 |
| Max. and min. transmission        | 0.5043 and 0.0873                                                  |                 |
| Refinement method                 | Full-matrix least-squares on F <sup>2</sup>                        |                 |
| Data / restraints / parameters    | 15678 / 429 / 914                                                  |                 |
| Goodness-of-fit on F <sup>2</sup> | 1.032                                                              |                 |
| Final R indices [I > 2σ(I)]       | R1 = 0.0545, wR2 = 0.1578                                          |                 |
| R indices (all data)              | R1 = 0.0916, wR2 = 0.1944                                          |                 |
| Largest diff. peak and hole       | 2.039 and -0.816 e.Å <sup>-3</sup>                                 |                 |

**Table S2.** Atomic coordinates ( $\times 10^4$ ) and equivalent isotropic displacement parameters ( $\text{\AA}^2 \times 10^3$ ) for  $\text{Au}_{24}(\text{SR})_{20}$ .  $U(\text{eq})$  is defined as one third of the trace of the orthogonalized  $U^{ij}$  tensor.

|        | x         | y        | z        | $U(\text{eq})$ |
|--------|-----------|----------|----------|----------------|
| C(24)  | 2979(17)  | 6872(12) | 1868(10) | 100(9)         |
| C(25)  | 2211(16)  | 6749(13) | 2348(13) | 150(16)        |
| C(26)  | 2036(14)  | 6866(13) | 2958(12) | 200(30)        |
| C(27)  | 2612(16)  | 7089(12) | 3140(10) | 200(30)        |
| C(28)  | 3383(15)  | 7198(14) | 2671(12) | 200(20)        |
| C(29)  | 3554(15)  | 7089(14) | 2063(11) | 136(13)        |
| C(127) | 2420(20)  | 7224(19) | 3808(12) | 370(50)        |
| C(128) | 2400(30)  | 7960(20) | 3670(20) | 410(60)        |
| C(129) | 2920(30)  | 6660(20) | 4278(12) | 490(80)        |
| C(130) | 1450(30)  | 7150(30) | 4190(15) | 640(120)       |
| C(42)  | -390(20)  | 3569(16) | 4140(15) | 176(15)        |
| C(43)  | 180(20)   | 3347(17) | 4602(18) | 203(18)        |
| C(44)  | 570(20)   | 2662(18) | 4875(15) | 250(20)        |
| C(45)  | 417(18)   | 2155(16) | 4726(14) | 280(30)        |
| C(46)  | -160(20)  | 2372(18) | 4278(16) | 240(20)        |
| C(47)  | -540(20)  | 3050(20) | 4003(14) | 208(19)        |
| C(123) | 850(30)   | 1398(16) | 5020(20) | 520(90)        |
| C(124) | 1410(30)  | 1140(20) | 4460(30) | 500            |
| C(125) | 220(30)   | 1042(17) | 5560(30) | 520(90)        |
| C(126) | 1560(30)  | 1320(20) | 5430(30) | 540(90)        |
| C(36)  | -1098(19) | 2954(15) | 2207(13) | 158(16)        |
| C(37)  | -1830(20) | 3113(11) | 2681(15) | 210(20)        |
| C(38)  | -2141(18) | 2617(13) | 3272(14) | 250(20)        |
| C(39)  | -1778(17) | 1937(12) | 3420(12) | 230(20)        |
| C(40)  | -1070(20) | 1775(12) | 2944(14) | 240(20)        |
| C(41)  | -748(19)  | 2266(16) | 2362(13) | 220(20)        |
| C(119) | -2110(30) | 1386(16) | 4072(15) | 400            |
| C(120) | -1400(30) | 1020(20) | 4481(16) | 400            |
| C(121) | -2650(30) | 1040(20) | 3910(20) | 510(90)        |
| C(122) | -2840(30) | 1730(20) | 4556(16) | 420(60)        |
| Au(1)  | 3763(1)   | 5388(1)  | 597(1)   | 79(1)          |

|        |          |          |          |         |
|--------|----------|----------|----------|---------|
| Au(2)  | 4339(1)  | 4202(1)  | 287(1)   | 78(1)   |
| Au(3)  | 1868(1)  | 4754(1)  | 1596(1)  | 87(1)   |
| Au(4)  | 1858(1)  | 6336(1)  | 274(1)   | 86(1)   |
| Au(5)  | 3766(1)  | 6844(1)  | -526(1)  | 88(1)   |
| Au(6)  | 5713(1)  | 4537(1)  | 725(1)   | 80(1)   |
| Au(7)  | 3911(1)  | 3905(1)  | 1791(1)  | 86(1)   |
| Au(8)  | 2739(1)  | 5032(1)  | 39(1)    | 83(1)   |
| Au(9)  | 3127(1)  | 5128(1)  | 2328(1)  | 96(1)   |
| Au(10) | 9(1)     | 4191(1)  | 2392(1)  | 104(1)  |
| Au(11) | 1114(1)  | 4638(1)  | 3192(1)  | 105(1)  |
| Au(12) | 927(1)   | 4263(1)  | 696(1)   | 100(1)  |
| S(1)   | -336(6)  | 4809(5)  | 3102(5)  | 118(3)  |
| S(2)   | 2627(5)  | 3627(4)  | 1792(4)  | 89(2)   |
| S(3)   | 1655(5)  | 4836(4)  | -345(4)  | 97(2)   |
| S(4)   | 3847(5)  | 5861(4)  | 1377(3)  | 88(2)   |
| S(5)   | 1113(5)  | 5882(4)  | 1359(4)  | 92(2)   |
| S(6)   | 2521(6)  | 4444(5)  | 3371(4)  | 111(3)  |
| S(7)   | 285(6)   | 3559(5)  | 1707(4)  | 110(3)  |
| S(8)   | 2457(6)  | 6914(4)  | -829(4)  | 100(2)  |
| S(9)   | 5168(6)  | 4143(4)  | 1890(4)  | 101(2)  |
| S(10)  | 4966(5)  | 3081(4)  | 263(4)   | 92(2)   |
| C(1)   | 3050(20) | 6703(15) | 1224(16) | 107(10) |
| C(2)   | 1840(20) | 7804(16) | -937(18) | 120(12) |
| C(3)   | 2320(20) | 4100(19) | -645(17) | 119(11) |
| C(4)   | 27(17)   | 5846(14) | 1233(14) | 85(8)   |
| C(5)   | 4440(20) | 2468(15) | 1045(19) | 127(13) |
| C(6)   | 2430(30) | 4901(19) | 3959(15) | 128(13) |
| C(7)   | -850(20) | 3547(17) | 1644(16) | 117(11) |
| C(8)   | -880(30) | 4270(20) | 3924(18) | 142(14) |
| C(9)   | 2230(20) | 3111(18) | 2689(14) | 111(11) |
| C(10)  | 5890(30) | 3330(20) | 2282(17) | 134(13) |
| C(12)  | 2500(20) | 2364(13) | 2790(15) | 122(12) |
| C(13)  | 1940(20) | 2061(17) | 2681(16) | 157(17) |
| C(14)  | 2170(30) | 1367(19) | 2750(20) | 210(30) |
| C(15)  | 2990(30) | 992(13)  | 2913(19) | 190(30) |
| C(16)  | 3540(20) | 1287(19) | 3050(20) | 200(30) |

|       |           |          |           |         |
|-------|-----------|----------|-----------|---------|
| C(17) | 3320(20)  | 1980(20) | 2980(20)  | 180(20) |
| C(18) | 5420(20)  | 2902(18) | 2963(14)  | 138(15) |
| C(19) | 5730(30)  | 2200(20) | 3169(18)  | 210(30) |
| C(20) | 5380(30)  | 1788(17) | 3800(20)  | 260(40) |
| C(21) | 4720(40)  | 2070(20) | 4220(20)  | 290(50) |
| C(22) | 4420(40)  | 2770(20) | 4024(19)  | 270(40) |
| C(23) | 4730(30)  | 3182(16) | 3383(18)  | 170(20) |
| C(30) | 1675(19)  | 8078(15) | -411(14)  | 120(9)  |
| C(31) | 846(16)   | 8097(13) | 1(16)     | 138(10) |
| C(32) | 664(17)   | 8353(17) | 519(17)   | 156(12) |
| C(33) | 1290(20)  | 8613(18) | 617(17)   | 148(11) |
| C(34) | 2131(19)  | 8566(18) | 230(18)   | 139(10) |
| C(35) | 2315(16)  | 8307(16) | -293(16)  | 130(10) |
| C(48) | 5083(17)  | 1815(13) | 1259(16)  | 107(10) |
| C(49) | 5480(20)  | 1693(16) | 1795(16)  | 137(15) |
| C(50) | 6080(20)  | 1090(20) | 2016(16)  | 171(19) |
| C(51) | 6290(30)  | 596(16)  | 1710(20)  | 160(20) |
| C(52) | 5900(30)  | 726(18)  | 1170(20)  | 180(20) |
| C(53) | 5310(20)  | 1332(19) | 940(17)   | 142(15) |
| C(54) | 2769(18)  | 4359(14) | -1375(12) | 97(9)   |
| C(55) | 2309(16)  | 4589(16) | -1897(15) | 141(14) |
| C(56) | 2740(20)  | 4780(18) | -2565(14) | 139(14) |
| C(57) | 3640(20)  | 4760(20) | -2716(13) | 128(13) |
| C(58) | 4105(15)  | 4500(20) | -2192(17) | 144(16) |
| C(59) | 3671(19)  | 4318(18) | -1526(15) | 127(13) |
| C(60) | -417(16)  | 6545(12) | 783(12)   | 88(8)   |
| C(61) | -948(17)  | 7046(15) | 1023(12)  | 117(11) |
| C(62) | -1391(18) | 7640(14) | 604(17)   | 124(12) |
| C(63) | -1300(20) | 7723(15) | -73(16)   | 124(12) |
| C(64) | -750(20)  | 7224(16) | -314(11)  | 116(11) |
| C(65) | -323(17)  | 6631(13) | 106(13)   | 98(9)   |
| C(66) | 2080(20)  | 4494(17) | 4673(13)  | 139(12) |
| C(67) | 2700(20)  | 4000(20) | 5027(17)  | 204(19) |
| C(68) | 2440(20)  | 3580(20) | 5690(17)  | 199(19) |
| C(69) | 1550(30)  | 3656(18) | 5979(13)  | 150(14) |
| C(70) | 930(20)   | 4160(20) | 5633(18)  | 170(16) |

|        |           |          |           |          |
|--------|-----------|----------|-----------|----------|
| C(71)  | 1190(20)  | 4566(19) | 4969(18)  | 161(15)  |
| C(72)  | -1820(30) | 8410(30) | -560(20)  | 158(15)  |
| C(73)  | -2350(40) | 8140(30) | -830(30)  | 240(30)  |
| C(74)  | -1210(40) | 8710(30) | -1210(30) | 230(30)  |
| C(75)  | -2200(30) | 8940(30) | -170(30)  | 190(20)  |
| C(76)  | 1030(30)  | 8920(30) | 1200(30)  | 165(17)  |
| C(77)  | 390(50)   | 8650(40) | 1850(40)  | 280(30)  |
| C(78)  | 410(40)   | 9650(40) | 960(30)   | 260(30)  |
| C(79)  | 1760(40)  | 9010(30) | 1370(30)  | 240(30)  |
| C(83)  | 7900(40)  | 110(40)  | 2000(30)  | 270(30)  |
| C(84)  | 7560(50)  | -440(40) | 1380(40)  | 320(40)  |
| C(85)  | 6730(50)  | -490(40) | 2590(40)  | 280(40)  |
| C(86)  | 1250(50)  | 2460(40) | 6710(50)  | 420(60)  |
| C(87)  | 460(30)   | 3360(30) | 7010(30)  | 220(20)  |
| C(88)  | 1300(30)  | 3100(30) | 6700(30)  | 200(20)  |
| C(91)  | 3910(60)  | 4790(50) | -3900(40) | 360(50)  |
| C(102) | 5070(50)  | 4870(40) | -3590(30) | 270(30)  |
| C(104) | 1880(40)  | 2970(40) | 7120(40)  | 360(50)  |
| C(101) | 4100(40)  | 5030(30) | -3450(30) | 172(18)  |
| C(103) | 3810(50)  | 5770(40) | -3830(40) | 300(40)  |
| C(107) | 7050(40)  | -160(30) | 1930(40)  | 210(20)  |
| C(115) | 4390(40)  | 1540(30) | 4990(30)  | 380(60)  |
| C(116) | 4560(70)  | 1920(50) | 5330(60)  | 500(80)  |
| C(117) | 3510(70)  | 1660(70) | 4910(80)  | 630(120) |
| C(118) | 4870(60)  | 860(50)  | 5130(50)  | 440(70)  |
| C(131) | 3290(30)  | 160(20)  | 3030(30)  | 270(30)  |
| C(132) | 2600(50)  | -40(50)  | 3500(40)  | 380(50)  |
| C(133) | 4050(50)  | -40(60)  | 3250(40)  | 460(70)  |
| C(134) | 3330(50)  | 130(40)  | 2440(30)  | 320(40)  |

---



**Table S3.** Bond lengths [Å] and angles [°] for Au<sub>24</sub>(SR)<sub>20</sub>.

|               |         |               |         |
|---------------|---------|---------------|---------|
| C(24)-C(29)   | 1.3663  | C(46)-H(46A)  | 0.9300  |
| C(24)-C(25)   | 1.3912  | C(47)-H(47A)  | 0.9300  |
| C(24)-C(1)    | 1.55(4) | C(123)-C(125) | 1.4466  |
| C(25)-C(26)   | 1.3876  | C(123)-C(124) | 1.4935  |
| C(25)-H(25A)  | 0.9300  | C(123)-C(126) | 1.5736  |
| C(26)-C(27)   | 1.3574  | C(124)-H(12G) | 0.9600  |
| C(26)-H(26A)  | 0.9300  | C(124)-H(12H) | 0.9600  |
| C(27)-C(28)   | 1.3799  | C(124)-H(12I) | 0.9600  |
| C(27)-C(127)  | 1.5302  | C(125)-H(12J) | 0.9600  |
| C(28)-C(29)   | 1.3754  | C(125)-H(12K) | 0.9600  |
| C(28)-H(28A)  | 0.9300  | C(125)-H(12L) | 0.9600  |
| C(29)-H(29A)  | 0.9300  | C(126)-H(12M) | 0.9600  |
| C(127)-C(129) | 1.4466  | C(126)-H(12N) | 0.9600  |
| C(127)-C(128) | 1.4935  | C(126)-H(12O) | 0.9600  |
| C(127)-C(130) | 1.5736  | C(36)-C(41)   | 1.3663  |
| C(128)-H(12A) | 0.9600  | C(36)-C(37)   | 1.3912  |
| C(128)-H(12B) | 0.9600  | C(36)-C(7)    | 1.45(4) |
| C(128)-H(12C) | 0.9600  | C(37)-C(38)   | 1.3877  |
| C(129)-H(12D) | 0.9600  | C(37)-H(37A)  | 0.9300  |
| C(129)-H(12E) | 0.9600  | C(38)-C(39)   | 1.3573  |
| C(129)-H(12F) | 0.9600  | C(38)-H(38A)  | 0.9300  |
| C(130)-H(13A) | 0.9600  | C(39)-C(40)   | 1.3800  |
| C(130)-H(13B) | 0.9600  | C(39)-C(119)  | 1.5301  |
| C(130)-H(13C) | 0.9600  | C(40)-C(41)   | 1.3753  |
| C(42)-C(47)   | 1.3663  | C(40)-H(40A)  | 0.9300  |
| C(42)-C(43)   | 1.3912  | C(41)-H(41A)  | 0.9300  |
| C(42)-C(8)    | 1.45(5) | C(119)-C(121) | 1.4466  |
| C(43)-C(44)   | 1.3877  | C(119)-C(120) | 1.4936  |
| C(43)-H(43A)  | 0.9300  | C(119)-C(122) | 1.5737  |
| C(44)-C(45)   | 1.3574  | C(120)-H(12P) | 0.9600  |
| C(44)-H(44A)  | 0.9300  | C(120)-H(12Q) | 0.9600  |
| C(45)-C(46)   | 1.3800  | C(120)-H(12R) | 0.9600  |
| C(45)-C(123)  | 1.5301  | C(121)-H(12S) | 0.9600  |
| C(46)-C(47)   | 1.3753  | C(121)-H(12T) | 0.9600  |

|               |            |               |            |
|---------------|------------|---------------|------------|
| C(121)-H(12U) | 0.9600     | Au(6)-S(9)    | 2.335(7)   |
| C(122)-H(12V) | 0.9600     | Au(6)-Au(1)#1 | 2.7231(16) |
| C(122)-H(12W) | 0.9600     | Au(6)-Au(2)#1 | 2.7477(15) |
| C(122)-H(12X) | 0.9600     | Au(6)-Au(8)#1 | 2.7554(17) |
| Au(1)-S(4)    | 2.351(7)   | Au(6)-Au(5)#1 | 3.0289(17) |
| Au(1)-Au(8)   | 2.7000(16) | Au(7)-S(9)    | 2.294(8)   |
| Au(1)-Au(6)#1 | 2.7231(16) | Au(7)-S(2)    | 2.297(8)   |
| Au(1)-Au(2)   | 2.7458(16) | Au(7)-Au(9)   | 3.1075(19) |
| Au(1)-Au(5)   | 3.1370(15) | Au(8)-S(3)    | 2.321(7)   |
| Au(1)-Au(6)   | 3.1626(17) | Au(8)-Au(6)#1 | 2.7554(17) |
| Au(1)-Au(7)   | 3.2330(15) | Au(9)-S(6)    | 2.294(8)   |
| Au(1)-Au(4)   | 3.2348(17) | Au(9)-S(4)    | 2.298(7)   |
| Au(1)-Au(2)#1 | 3.2700(16) | Au(10)-S(7)   | 2.278(9)   |
| Au(2)-S(10)   | 2.357(7)   | Au(10)-S(1)   | 2.282(10)  |
| Au(2)-Au(8)   | 2.7281(17) | Au(10)-Au(11) | 3.327(2)   |
| Au(2)-Au(6)#1 | 2.7477(15) | Au(11)-S(6)   | 2.283(10)  |
| Au(2)-Au(6)   | 2.9762(17) | Au(11)-S(1)   | 2.292(10)  |
| Au(2)-Au(7)   | 2.9993(16) | Au(12)-S(3)   | 2.281(8)   |
| Au(2)-Au(5)#1 | 3.2561(17) | Au(12)-S(7)   | 2.290(9)   |
| Au(2)-Au(1)#1 | 3.2700(16) | S(1)-C(8)     | 1.84(4)    |
| Au(3)-S(5)    | 2.311(8)   | S(2)-C(9)     | 1.87(3)    |
| Au(3)-S(2)    | 2.316(7)   | S(3)-C(3)     | 1.88(3)    |
| Au(3)-Au(8)   | 3.1787(17) | S(4)-C(1)     | 1.87(3)    |
| Au(3)-Au(11)  | 3.2864(18) | S(5)-C(4)     | 1.86(3)    |
| Au(3)-Au(10)  | 3.3002(18) | S(6)-C(6)     | 1.86(3)    |
| Au(3)-Au(7)   | 3.3109(18) | S(7)-C(7)     | 1.86(4)    |
| Au(3)-Au(9)   | 3.3114(19) | S(8)-C(2)     | 1.85(3)    |
| Au(3)-Au(12)  | 3.3776(19) | S(9)-C(10)    | 1.83(4)    |
| Au(4)-S(5)    | 2.296(7)   | S(10)-C(5)    | 1.86(3)    |
| Au(4)-S(8)    | 2.306(8)   | S(10)-Au(5)#1 | 2.316(8)   |
| Au(4)-Au(8)   | 2.9413(17) | C(1)-H(1A)    | 0.9700     |
| Au(4)-Au(5)   | 3.3223(17) | C(1)-H(1B)    | 0.9700     |
| Au(5)-S(8)    | 2.311(8)   | C(2)-C(30)    | 1.42(4)    |
| Au(5)-S(10)#1 | 2.316(8)   | C(2)-H(2A)    | 0.9700     |
| Au(5)-Au(6)#1 | 3.0289(17) | C(2)-H(2B)    | 0.9700     |
| Au(5)-Au(2)#1 | 3.2561(17) | C(3)-C(54)    | 1.51(4)    |

|              |         |              |         |
|--------------|---------|--------------|---------|
| C(3)-H(3A)   | 0.9700  | C(20)-C(21)  | 1.37(2) |
| C(3)-H(3B)   | 0.9700  | C(20)-H(20A) | 0.9300  |
| C(4)-C(60)   | 1.53(3) | C(21)-C(22)  | 1.38(2) |
| C(4)-H(4A)   | 0.9700  | C(21)-C(115) | 1.66(3) |
| C(4)-H(4B)   | 0.9700  | C(22)-C(23)  | 1.37(2) |
| C(5)-C(48)   | 1.48(4) | C(22)-H(22A) | 0.9300  |
| C(5)-H(5A)   | 0.9700  | C(23)-H(23A) | 0.9300  |
| C(5)-H(5B)   | 0.9700  | C(30)-C(35)  | 1.37(2) |
| C(6)-C(66)   | 1.50(4) | C(30)-C(31)  | 1.38(2) |
| C(6)-H(6A)   | 0.9700  | C(31)-C(32)  | 1.37(2) |
| C(6)-H(6B)   | 0.9700  | C(31)-H(31A) | 0.9300  |
| C(7)-H(7A)   | 0.9700  | C(32)-C(33)  | 1.37(2) |
| C(7)-H(7B)   | 0.9700  | C(32)-H(32A) | 0.9300  |
| C(8)-H(8A)   | 0.9700  | C(33)-C(34)  | 1.38(2) |
| C(8)-H(8B)   | 0.9700  | C(33)-C(76)  | 1.56(5) |
| C(9)-C(12)   | 1.49(4) | C(34)-C(35)  | 1.38(2) |
| C(9)-H(9A)   | 0.9700  | C(34)-H(34A) | 0.9300  |
| C(9)-H(9B)   | 0.9700  | C(35)-H(35A) | 0.9300  |
| C(10)-C(18)  | 1.53(4) | C(48)-C(49)  | 1.38(2) |
| C(10)-H(10A) | 0.9700  | C(48)-C(53)  | 1.38(2) |
| C(10)-H(10B) | 0.9700  | C(49)-C(50)  | 1.38(2) |
| C(12)-C(13)  | 1.37(2) | C(49)-H(49A) | 0.9300  |
| C(12)-C(17)  | 1.40(2) | C(50)-C(51)  | 1.38(2) |
| C(13)-C(14)  | 1.40(2) | C(50)-H(50A) | 0.9300  |
| C(13)-H(13D) | 0.9300  | C(51)-C(52)  | 1.39(2) |
| C(14)-C(15)  | 1.39(2) | C(51)-C(107) | 1.71(7) |
| C(14)-H(14A) | 0.9300  | C(52)-C(53)  | 1.37(2) |
| C(15)-C(16)  | 1.37(2) | C(52)-H(52A) | 0.9300  |
| C(15)-C(131) | 1.64(3) | C(53)-H(53A) | 0.9300  |
| C(16)-C(17)  | 1.38(2) | C(54)-C(59)  | 1.37(2) |
| C(16)-H(16A) | 0.9300  | C(54)-C(55)  | 1.38(2) |
| C(17)-H(17A) | 0.9300  | C(55)-C(56)  | 1.38(2) |
| C(18)-C(19)  | 1.38(2) | C(55)-H(55A) | 0.9300  |
| C(18)-C(23)  | 1.38(2) | C(56)-C(57)  | 1.38(2) |
| C(19)-C(20)  | 1.37(2) | C(56)-H(56A) | 0.9300  |
| C(19)-H(19A) | 0.9300  | C(57)-C(58)  | 1.37(2) |

|              |         |              |         |
|--------------|---------|--------------|---------|
| C(57)-C(101) | 1.52(6) | C(75)-H(75B) | 0.9600  |
| C(58)-C(59)  | 1.38(2) | C(75)-H(75C) | 0.9600  |
| C(58)-H(58A) | 0.9300  | C(76)-C(79)  | 1.41(7) |
| C(59)-H(59A) | 0.9300  | C(76)-C(77)  | 1.51(7) |
| C(60)-C(61)  | 1.36(2) | C(76)-C(78)  | 1.59(7) |
| C(60)-C(65)  | 1.38(2) | C(77)-H(77A) | 0.9600  |
| C(61)-C(62)  | 1.38(2) | C(77)-H(77B) | 0.9600  |
| C(61)-H(61A) | 0.9300  | C(77)-H(77C) | 0.9600  |
| C(62)-C(63)  | 1.38(2) | C(78)-H(78A) | 0.9600  |
| C(62)-H(62A) | 0.9300  | C(78)-H(78B) | 0.9600  |
| C(63)-C(64)  | 1.37(2) | C(78)-H(78C) | 0.9600  |
| C(63)-C(72)  | 1.60(5) | C(79)-H(79A) | 0.9600  |
| C(64)-C(65)  | 1.37(2) | C(79)-H(79B) | 0.9600  |
| C(64)-H(64A) | 0.9300  | C(79)-H(79C) | 0.9600  |
| C(65)-H(65A) | 0.9300  | C(83)-C(107) | 1.67(8) |
| C(66)-C(67)  | 1.38(2) | C(83)-H(83A) | 0.9600  |
| C(66)-C(71)  | 1.38(2) | C(83)-H(83B) | 0.9600  |
| C(67)-C(68)  | 1.40(2) | C(83)-H(83C) | 0.9600  |
| C(67)-H(67A) | 0.9300  | C(84)-C(107) | 1.48(8) |
| C(68)-C(69)  | 1.38(2) | C(84)-H(84A) | 0.9600  |
| C(68)-H(68A) | 0.9300  | C(84)-H(84B) | 0.9600  |
| C(69)-C(70)  | 1.37(2) | C(84)-H(84C) | 0.9600  |
| C(69)-C(88)  | 1.58(7) | C(85)-C(107) | 1.35(8) |
| C(70)-C(71)  | 1.38(2) | C(85)-H(85A) | 0.9600  |
| C(70)-H(70A) | 0.9300  | C(85)-H(85B) | 0.9600  |
| C(71)-H(71A) | 0.9300  | C(85)-H(85C) | 0.9600  |
| C(72)-C(73)  | 1.51(7) | C(86)-C(88)  | 1.40(4) |
| C(72)-C(74)  | 1.51(6) | C(86)-H(86A) | 0.9600  |
| C(72)-C(75)  | 1.57(6) | C(86)-H(86B) | 0.9600  |
| C(73)-H(73A) | 0.9600  | C(86)-H(86C) | 0.9600  |
| C(73)-H(73B) | 0.9600  | C(87)-C(88)  | 1.39(4) |
| C(73)-H(73C) | 0.9600  | C(87)-H(87A) | 0.9600  |
| C(74)-H(74A) | 0.9600  | C(87)-H(87B) | 0.9600  |
| C(74)-H(74B) | 0.9600  | C(87)-H(87C) | 0.9600  |
| C(74)-H(74C) | 0.9600  | C(88)-C(104) | 1.40(4) |
| C(75)-H(75A) | 0.9600  | C(91)-C(101) | 1.41(9) |

|                     |         |                      |         |
|---------------------|---------|----------------------|---------|
| C(91)-H(91A)        | 0.9600  | C(116)-H(11C)        | 0.9600  |
| C(91)-H(91B)        | 0.9600  | C(117)-H(11D)        | 0.9600  |
| C(91)-H(91C)        | 0.9600  | C(117)-H(11E)        | 0.9600  |
| C(102)-C(101)       | 1.47(7) | C(117)-H(11F)        | 0.9600  |
| C(102)-H(10C)       | 0.9600  | C(118)-H(11G)        | 0.9600  |
| C(102)-H(10D)       | 0.9600  | C(118)-H(11H)        | 0.9600  |
| C(102)-H(10E)       | 0.9600  | C(118)-H(11I)        | 0.9600  |
| C(104)-H(10F)       | 0.9600  | C(131)-C(134)        | 1.32(5) |
| C(104)-H(10G)       | 0.9600  | C(131)-C(132)        | 1.32(5) |
| C(104)-H(10H)       | 0.9600  | C(131)-C(133)        | 1.32(5) |
| C(101)-C(103)       | 1.49(8) | C(132)-H(13E)        | 0.9600  |
| C(103)-H(10I)       | 0.9600  | C(132)-H(13F)        | 0.9600  |
| C(103)-H(10J)       | 0.9600  | C(132)-H(13G)        | 0.9600  |
| C(103)-H(10K)       | 0.9600  | C(133)-H(13H)        | 0.9600  |
| C(115)-C(118)       | 1.40(7) | C(133)-H(13I)        | 0.9600  |
| C(115)-C(117)       | 1.41(7) | C(133)-H(13J)        | 0.9600  |
| C(115)-C(116)       | 1.41(7) | C(134)-H(13K)        | 0.9600  |
| C(116)-H(11A)       | 0.9600  | C(134)-H(13L)        | 0.9600  |
| C(116)-H(11B)       | 0.9600  | C(134)-H(13M)        | 0.9600  |
| ----Bond angles---- |         |                      |         |
| C(29)-C(24)-C(25)   | 114.0   | C(24)-C(29)-H(29A)   | 118.3   |
| C(29)-C(24)-C(1)    | 131(2)  | C(28)-C(29)-H(29A)   | 118.3   |
| C(25)-C(24)-C(1)    | 115(2)  | C(129)-C(127)-C(128) | 124.1   |
| C(26)-C(25)-C(24)   | 122.6   | C(129)-C(127)-C(27)  | 108.9   |
| C(26)-C(25)-H(25A)  | 118.7   | C(128)-C(127)-C(27)  | 110.0   |
| C(24)-C(25)-H(25A)  | 118.7   | C(129)-C(127)-C(130) | 100.1   |
| C(27)-C(26)-C(25)   | 122.5   | C(128)-C(127)-C(130) | 102.3   |
| C(27)-C(26)-H(26A)  | 118.7   | C(27)-C(127)-C(130)  | 110.2   |
| C(25)-C(26)-H(26A)  | 118.7   | C(127)-C(128)-H(12A) | 109.5   |
| C(26)-C(27)-C(28)   | 115.1   | C(127)-C(128)-H(12B) | 109.5   |
| C(26)-C(27)-C(127)  | 123.0   | H(12A)-C(128)-H(12B) | 109.5   |
| C(28)-C(27)-C(127)  | 121.9   | C(127)-C(128)-H(12C) | 109.5   |
| C(29)-C(28)-C(27)   | 122.5   | H(12A)-C(128)-H(12C) | 109.5   |
| C(29)-C(28)-H(28A)  | 118.7   | H(12B)-C(128)-H(12C) | 109.5   |
| C(27)-C(28)-H(28A)  | 118.7   | C(127)-C(129)-H(12D) | 109.5   |
| C(24)-C(29)-C(28)   | 123.3   | C(127)-C(129)-H(12E) | 109.5   |

|                      |        |                      |        |
|----------------------|--------|----------------------|--------|
| H(12D)-C(129)-H(12E) | 109.5  | H(12G)-C(124)-H(12H) | 109.5  |
| C(127)-C(129)-H(12F) | 109.5  | C(123)-C(124)-H(12I) | 109.5  |
| H(12D)-C(129)-H(12F) | 109.5  | H(12G)-C(124)-H(12I) | 109.5  |
| H(12E)-C(129)-H(12F) | 109.5  | H(12H)-C(124)-H(12I) | 109.5  |
| C(127)-C(130)-H(13A) | 109.5  | C(123)-C(125)-H(12J) | 109.5  |
| C(127)-C(130)-H(13B) | 109.5  | C(123)-C(125)-H(12K) | 109.5  |
| H(13A)-C(130)-H(13B) | 109.5  | H(12J)-C(125)-H(12K) | 109.5  |
| C(127)-C(130)-H(13C) | 109.5  | C(123)-C(125)-H(12L) | 109.5  |
| H(13A)-C(130)-H(13C) | 109.5  | H(12J)-C(125)-H(12L) | 109.5  |
| H(13B)-C(130)-H(13C) | 109.5  | H(12K)-C(125)-H(12L) | 109.5  |
| C(47)-C(42)-C(43)    | 114.0  | C(123)-C(126)-H(12M) | 109.5  |
| C(47)-C(42)-C(8)     | 124(3) | C(123)-C(126)-H(12N) | 109.5  |
| C(43)-C(42)-C(8)     | 122(3) | H(12M)-C(126)-H(12N) | 109.5  |
| C(44)-C(43)-C(42)    | 122.6  | C(123)-C(126)-H(12O) | 109.5  |
| C(44)-C(43)-H(43A)   | 118.7  | H(12M)-C(126)-H(12O) | 109.5  |
| C(42)-C(43)-H(43A)   | 118.7  | H(12N)-C(126)-H(12O) | 109.5  |
| C(45)-C(44)-C(43)    | 122.5  | C(41)-C(36)-C(37)    | 114.0  |
| C(45)-C(44)-H(44A)   | 118.7  | C(41)-C(36)-C(7)     | 132(3) |
| C(43)-C(44)-H(44A)   | 118.7  | C(37)-C(36)-C(7)     | 114(3) |
| C(44)-C(45)-C(46)    | 115.1  | C(38)-C(37)-C(36)    | 122.6  |
| C(44)-C(45)-C(123)   | 123.1  | C(38)-C(37)-H(37A)   | 118.7  |
| C(46)-C(45)-C(123)   | 121.9  | C(36)-C(37)-H(37A)   | 118.7  |
| C(47)-C(46)-C(45)    | 122.5  | C(39)-C(38)-C(37)    | 122.5  |
| C(47)-C(46)-H(46A)   | 118.7  | C(39)-C(38)-H(38A)   | 118.7  |
| C(45)-C(46)-H(46A)   | 118.7  | C(37)-C(38)-H(38A)   | 118.7  |
| C(42)-C(47)-C(46)    | 123.3  | C(38)-C(39)-C(40)    | 115.1  |
| C(42)-C(47)-H(47A)   | 118.4  | C(38)-C(39)-C(119)   | 123.0  |
| C(46)-C(47)-H(47A)   | 118.4  | C(40)-C(39)-C(119)   | 121.9  |
| C(125)-C(123)-C(124) | 124.1  | C(41)-C(40)-C(39)    | 122.5  |
| C(125)-C(123)-C(45)  | 108.9  | C(41)-C(40)-H(40A)   | 118.7  |
| C(124)-C(123)-C(45)  | 110.0  | C(39)-C(40)-H(40A)   | 118.7  |
| C(125)-C(123)-C(126) | 100.1  | C(36)-C(41)-C(40)    | 123.3  |
| C(124)-C(123)-C(126) | 102.3  | C(36)-C(41)-H(41A)   | 118.3  |
| C(45)-C(123)-C(126)  | 110.2  | C(40)-C(41)-H(41A)   | 118.3  |
| C(123)-C(124)-H(12G) | 109.5  | C(121)-C(119)-C(120) | 124.1  |
| C(123)-C(124)-H(12H) | 109.5  | C(121)-C(119)-C(39)  | 108.9  |

|                      |            |                       |            |
|----------------------|------------|-----------------------|------------|
| C(120)-C(119)-C(39)  | 110.0      | Au(5)-Au(1)-Au(6)     | 111.54(5)  |
| C(121)-C(119)-C(122) | 100.1      | S(4)-Au(1)-Au(7)      | 88.11(18)  |
| C(120)-C(119)-C(122) | 102.3      | Au(8)-Au(1)-Au(7)     | 91.07(4)   |
| C(39)-C(119)-C(122)  | 110.2      | Au(6)#1-Au(1)-Au(7)   | 119.81(5)  |
| C(119)-C(120)-H(12P) | 109.5      | Au(2)-Au(1)-Au(7)     | 59.56(4)   |
| C(119)-C(120)-H(12Q) | 109.5      | Au(5)-Au(1)-Au(7)     | 174.81(5)  |
| H(12P)-C(120)-H(12Q) | 109.5      | Au(6)-Au(1)-Au(7)     | 64.47(4)   |
| C(119)-C(120)-H(12R) | 109.5      | S(4)-Au(1)-Au(4)      | 95.25(19)  |
| H(12P)-C(120)-H(12R) | 109.5      | Au(8)-Au(1)-Au(4)     | 58.59(4)   |
| H(12Q)-C(120)-H(12R) | 109.5      | Au(6)#1-Au(1)-Au(4)   | 89.69(5)   |
| C(119)-C(121)-H(12S) | 109.5      | Au(2)-Au(1)-Au(4)     | 118.71(5)  |
| C(119)-C(121)-H(12T) | 109.5      | Au(5)-Au(1)-Au(4)     | 62.83(4)   |
| H(12S)-C(121)-H(12T) | 109.5      | Au(6)-Au(1)-Au(4)     | 173.11(5)  |
| C(119)-C(121)-H(12U) | 109.5      | Au(7)-Au(1)-Au(4)     | 121.39(5)  |
| H(12S)-C(121)-H(12U) | 109.5      | S(4)-Au(1)-Au(2)#1    | 89.12(19)  |
| H(12T)-C(121)-H(12U) | 109.5      | Au(8)-Au(1)-Au(2)#1   | 119.64(5)  |
| C(119)-C(122)-H(12V) | 109.5      | Au(6)#1-Au(1)-Au(2)#1 | 58.71(4)   |
| C(119)-C(122)-H(12W) | 109.5      | Au(2)-Au(1)-Au(2)#1   | 86.78(5)   |
| H(12V)-C(122)-H(12W) | 109.5      | Au(5)-Au(1)-Au(2)#1   | 61.05(4)   |
| C(119)-C(122)-H(12X) | 109.5      | Au(6)-Au(1)-Au(2)#1   | 50.54(3)   |
| H(12V)-C(122)-H(12X) | 109.5      | Au(7)-Au(1)-Au(2)#1   | 115.00(5)  |
| H(12W)-C(122)-H(12X) | 109.5      | Au(4)-Au(1)-Au(2)#1   | 123.53(4)  |
| S(4)-Au(1)-Au(8)     | 148.2(2)   | S(10)-Au(2)-Au(8)     | 131.2(2)   |
| S(4)-Au(1)-Au(6)#1   | 143.34(19) | S(10)-Au(2)-Au(1)     | 166.4(2)   |
| Au(8)-Au(1)-Au(6)#1  | 61.07(4)   | Au(8)-Au(2)-Au(1)     | 59.11(4)   |
| S(4)-Au(1)-Au(2)     | 141.41(19) | S(10)-Au(2)-Au(6)#1   | 131.51(19) |
| Au(8)-Au(1)-Au(2)    | 60.12(4)   | Au(8)-Au(2)-Au(6)#1   | 60.42(4)   |
| Au(6)#1-Au(1)-Au(2)  | 60.32(4)   | Au(1)-Au(2)-Au(6)#1   | 59.43(4)   |
| S(4)-Au(1)-Au(5)     | 88.46(18)  | S(10)-Au(2)-Au(6)     | 103.1(2)   |
| Au(8)-Au(1)-Au(5)    | 93.90(5)   | Au(8)-Au(2)-Au(6)     | 125.60(5)  |
| Au(6)#1-Au(1)-Au(5)  | 61.77(4)   | Au(1)-Au(2)-Au(6)     | 66.97(4)   |
| Au(2)-Au(1)-Au(5)    | 122.03(5)  | Au(6)#1-Au(2)-Au(6)   | 87.14(4)   |
| S(4)-Au(1)-Au(6)     | 88.40(19)  | S(10)-Au(2)-Au(7)     | 99.85(19)  |
| Au(8)-Au(1)-Au(6)    | 119.70(5)  | Au(8)-Au(2)-Au(7)     | 95.72(5)   |
| Au(6)#1-Au(1)-Au(6)  | 83.92(5)   | Au(1)-Au(2)-Au(7)     | 68.33(4)   |
| Au(2)-Au(1)-Au(6)    | 60.00(4)   | Au(6)#1-Au(2)-Au(7)   | 127.68(5)  |

|                       |           |                       |            |
|-----------------------|-----------|-----------------------|------------|
| Au(6)-Au(2)-Au(7)     | 69.63(4)  | S(2)-Au(3)-Au(12)     | 79.29(19)  |
| S(10)-Au(2)-Au(5)#1   | 45.32(19) | Au(8)-Au(3)-Au(12)    | 63.12(4)   |
| Au(8)-Au(2)-Au(5)#1   | 176.25(6) | Au(11)-Au(3)-Au(12)   | 124.71(5)  |
| Au(1)-Au(2)-Au(5)#1   | 124.57(5) | Au(10)-Au(3)-Au(12)   | 64.11(4)   |
| Au(6)#1-Au(2)-Au(5)#1 | 120.11(5) | Au(7)-Au(3)-Au(12)    | 114.92(5)  |
| Au(6)-Au(2)-Au(5)#1   | 57.95(4)  | Au(9)-Au(3)-Au(12)    | 169.84(6)  |
| Au(7)-Au(2)-Au(5)#1   | 86.71(4)  | S(5)-Au(4)-S(8)       | 172.6(3)   |
| S(10)-Au(2)-Au(1)#1   | 87.01(19) | S(5)-Au(4)-Au(8)      | 97.7(2)    |
| Au(8)-Au(2)-Au(1)#1   | 123.10(4) | S(8)-Au(4)-Au(8)      | 88.8(2)    |
| Au(1)-Au(2)-Au(1)#1   | 93.22(5)  | S(5)-Au(4)-Au(1)      | 94.11(19)  |
| Au(6)#1-Au(2)-Au(1)#1 | 62.70(4)  | S(8)-Au(4)-Au(1)      | 92.7(2)    |
| Au(6)-Au(2)-Au(1)#1   | 51.43(4)  | Au(8)-Au(4)-Au(1)     | 51.58(4)   |
| Au(7)-Au(2)-Au(1)#1   | 120.46(5) | S(5)-Au(4)-Au(5)      | 139.7(2)   |
| Au(5)#1-Au(2)-Au(1)#1 | 57.46(3)  | S(8)-Au(4)-Au(5)      | 44.0(2)    |
| S(5)-Au(3)-S(2)       | 177.9(3)  | Au(8)-Au(4)-Au(5)     | 85.87(4)   |
| S(5)-Au(3)-Au(8)      | 91.11(19) | Au(1)-Au(4)-Au(5)     | 57.14(3)   |
| S(2)-Au(3)-Au(8)      | 86.94(18) | S(8)-Au(5)-S(10)#1    | 173.0(3)   |
| S(5)-Au(3)-Au(11)     | 84.78(19) | S(8)-Au(5)-Au(6)#1    | 83.9(2)    |
| S(2)-Au(3)-Au(11)     | 97.27(18) | S(10)#1-Au(5)-Au(6)#1 | 102.61(19) |
| Au(8)-Au(3)-Au(11)    | 171.62(6) | S(8)-Au(5)-Au(1)      | 95.18(19)  |
| S(5)-Au(3)-Au(10)     | 91.20(19) | S(10)#1-Au(5)-Au(1)   | 90.94(17)  |
| S(2)-Au(3)-Au(10)     | 89.30(19) | Au(6)#1-Au(5)-Au(1)   | 52.38(4)   |
| Au(8)-Au(3)-Au(10)    | 126.86(5) | S(8)-Au(5)-Au(2)#1    | 140.2(2)   |
| Au(11)-Au(3)-Au(10)   | 60.67(4)  | S(10)#1-Au(5)-Au(2)#1 | 46.34(19)  |
| S(5)-Au(3)-Au(7)      | 136.6(2)  | Au(6)#1-Au(5)-Au(2)#1 | 56.39(4)   |
| S(2)-Au(3)-Au(7)      | 43.90(19) | Au(1)-Au(5)-Au(2)#1   | 61.49(4)   |
| Au(8)-Au(3)-Au(7)     | 81.81(4)  | S(8)-Au(5)-Au(4)      | 43.91(19)  |
| Au(11)-Au(3)-Au(7)    | 96.17(4)  | S(10)#1-Au(5)-Au(4)   | 138.75(19) |
| Au(10)-Au(3)-Au(7)    | 126.98(5) | Au(6)#1-Au(5)-Au(4)   | 83.08(4)   |
| S(5)-Au(3)-Au(9)      | 87.1(2)   | Au(1)-Au(5)-Au(4)     | 60.03(4)   |
| S(2)-Au(3)-Au(9)      | 94.28(19) | Au(2)#1-Au(5)-Au(4)   | 121.19(4)  |
| Au(8)-Au(3)-Au(9)     | 109.00(5) | S(9)-Au(6)-Au(1)#1    | 161.7(2)   |
| Au(11)-Au(3)-Au(9)    | 63.57(4)  | S(9)-Au(6)-Au(2)#1    | 135.6(2)   |
| Au(10)-Au(3)-Au(9)    | 124.13(5) | Au(1)#1-Au(6)-Au(2)#1 | 60.25(4)   |
| Au(7)-Au(3)-Au(9)     | 55.97(4)  | S(9)-Au(6)-Au(8)#1    | 133.2(2)   |
| S(5)-Au(3)-Au(12)     | 99.1(2)   | Au(1)#1-Au(6)-Au(8)#1 | 59.05(4)   |



|                       |           |                     |           |
|-----------------------|-----------|---------------------|-----------|
| Au(2)#1-Au(6)-Au(8)#1 | 59.44(4)  | Au(2)-Au(8)-Au(6)#1 | 60.14(4)  |
| S(9)-Au(6)-Au(2)      | 97.4(2)   | S(3)-Au(8)-Au(4)    | 101.2(2)  |
| Au(1)#1-Au(6)-Au(2)   | 69.86(4)  | Au(1)-Au(8)-Au(4)   | 69.83(4)  |
| Au(2)#1-Au(6)-Au(2)   | 92.86(4)  | Au(2)-Au(8)-Au(4)   | 130.60(5) |
| Au(8)#1-Au(6)-Au(2)   | 128.76(5) | Au(6)#1-Au(8)-Au(4) | 95.46(5)  |
| S(9)-Au(6)-Au(5)#1    | 97.3(2)   | S(3)-Au(8)-Au(3)    | 100.7(2)  |
| Au(1)#1-Au(6)-Au(5)#1 | 65.85(4)  | Au(1)-Au(8)-Au(3)   | 72.38(4)  |
| Au(2)#1-Au(6)-Au(5)#1 | 126.04(5) | Au(2)-Au(8)-Au(3)   | 94.73(4)  |
| Au(8)#1-Au(6)-Au(5)#1 | 95.21(5)  | Au(6)#1-Au(8)-Au(3) | 132.13(5) |
| Au(2)-Au(6)-Au(5)#1   | 65.66(4)  | Au(4)-Au(8)-Au(3)   | 69.64(4)  |
| S(9)-Au(6)-Au(1)      | 85.6(2)   | S(6)-Au(9)-S(4)     | 170.9(3)  |
| Au(1)#1-Au(6)-Au(1)   | 96.08(5)  | S(6)-Au(9)-Au(7)    | 92.9(2)   |
| Au(2)#1-Au(6)-Au(1)   | 66.76(4)  | S(4)-Au(9)-Au(7)    | 92.16(19) |
| Au(8)#1-Au(6)-Au(1)   | 126.17(5) | S(6)-Au(9)-Au(3)    | 90.3(2)   |
| Au(2)-Au(6)-Au(1)     | 53.03(4)  | S(4)-Au(9)-Au(3)    | 98.72(18) |
| Au(5)#1-Au(6)-Au(1)   | 118.40(5) | Au(7)-Au(9)-Au(3)   | 62.01(4)  |
| S(9)-Au(7)-S(2)       | 175.0(3)  | S(7)-Au(10)-S(1)    | 177.1(3)  |
| S(9)-Au(7)-Au(2)      | 97.63(19) | S(7)-Au(10)-Au(3)   | 89.8(2)   |
| S(2)-Au(7)-Au(2)      | 87.23(18) | S(1)-Au(10)-Au(3)   | 93.1(2)   |
| S(9)-Au(7)-Au(9)      | 78.2(2)   | S(7)-Au(10)-Au(11)  | 139.0(2)  |
| S(2)-Au(7)-Au(9)      | 100.3(2)  | S(1)-Au(10)-Au(11)  | 43.4(2)   |
| Au(2)-Au(7)-Au(9)     | 118.69(5) | Au(3)-Au(10)-Au(11) | 59.46(4)  |
| S(9)-Au(7)-Au(1)      | 84.59(19) | S(6)-Au(11)-S(1)    | 175.5(3)  |
| S(2)-Au(7)-Au(1)      | 99.20(17) | S(6)-Au(11)-Au(3)   | 91.1(2)   |
| Au(2)-Au(7)-Au(1)     | 52.12(3)  | S(1)-Au(11)-Au(3)   | 93.3(2)   |
| Au(9)-Au(7)-Au(1)     | 66.67(4)  | S(6)-Au(11)-Au(10)  | 139.7(2)  |
| S(9)-Au(7)-Au(3)      | 136.4(2)  | S(1)-Au(11)-Au(10)  | 43.2(2)   |
| S(2)-Au(7)-Au(3)      | 44.37(18) | Au(3)-Au(11)-Au(10) | 59.87(4)  |
| Au(2)-Au(7)-Au(3)     | 87.16(4)  | S(3)-Au(12)-S(7)    | 172.5(3)  |
| Au(9)-Au(7)-Au(3)     | 62.02(4)  | S(3)-Au(12)-Au(3)   | 96.1(2)   |
| Au(1)-Au(7)-Au(3)     | 64.50(4)  | S(7)-Au(12)-Au(3)   | 87.6(2)   |
| S(3)-Au(8)-Au(1)      | 170.0(2)  | C(8)-S(1)-Au(10)    | 106.0(14) |
| S(3)-Au(8)-Au(2)      | 128.0(2)  | C(8)-S(1)-Au(11)    | 105.9(14) |
| Au(1)-Au(8)-Au(2)     | 60.77(4)  | Au(10)-S(1)-Au(11)  | 93.3(4)   |
| S(3)-Au(8)-Au(6)#1    | 127.1(2)  | C(9)-S(2)-Au(7)     | 106.0(11) |
| Au(1)-Au(8)-Au(6)#1   | 59.88(4)  | C(9)-S(2)-Au(3)     | 108.2(12) |

|                     |           |                  |           |
|---------------------|-----------|------------------|-----------|
| Au(7)-S(2)-Au(3)    | 91.7(3)   | H(2A)-C(2)-H(2B) | 106.8     |
| C(3)-S(3)-Au(12)    | 101.0(11) | C(54)-C(3)-S(3)  | 111(2)    |
| C(3)-S(3)-Au(8)     | 99.8(11)  | C(54)-C(3)-H(3A) | 109.5     |
| Au(12)-S(3)-Au(8)   | 96.6(3)   | S(3)-C(3)-H(3A)  | 109.5     |
| C(1)-S(4)-Au(9)     | 104.3(10) | C(54)-C(3)-H(3B) | 109.5     |
| C(1)-S(4)-Au(1)     | 107.1(11) | S(3)-C(3)-H(3B)  | 109.5     |
| Au(9)-S(4)-Au(1)    | 97.2(3)   | H(3A)-C(3)-H(3B) | 108.0     |
| C(4)-S(5)-Au(4)     | 103.5(9)  | C(60)-C(4)-S(5)  | 111.5(19) |
| C(4)-S(5)-Au(3)     | 102.9(9)  | C(60)-C(4)-H(4A) | 109.3     |
| Au(4)-S(5)-Au(3)    | 98.9(3)   | S(5)-C(4)-H(4A)  | 109.3     |
| C(6)-S(6)-Au(11)    | 105.6(13) | C(60)-C(4)-H(4B) | 109.3     |
| C(6)-S(6)-Au(9)     | 104.7(12) | S(5)-C(4)-H(4B)  | 109.3     |
| Au(11)-S(6)-Au(9)   | 98.8(3)   | H(4A)-C(4)-H(4B) | 108.0     |
| C(7)-S(7)-Au(10)    | 103.1(12) | C(48)-C(5)-S(10) | 110(2)    |
| C(7)-S(7)-Au(12)    | 109.0(10) | C(48)-C(5)-H(5A) | 109.8     |
| Au(10)-S(7)-Au(12)  | 101.8(4)  | S(10)-C(5)-H(5A) | 109.8     |
| C(2)-S(8)-Au(4)     | 101.6(11) | C(48)-C(5)-H(5B) | 109.8     |
| C(2)-S(8)-Au(5)     | 105.3(13) | S(10)-C(5)-H(5B) | 109.8     |
| Au(4)-S(8)-Au(5)    | 92.1(3)   | H(5A)-C(5)-H(5B) | 108.2     |
| C(10)-S(9)-Au(7)    | 108.3(14) | C(66)-C(6)-S(6)  | 111(3)    |
| C(10)-S(9)-Au(6)    | 108.8(12) | C(66)-C(6)-H(6A) | 109.5     |
| Au(7)-S(9)-Au(6)    | 95.0(3)   | S(6)-C(6)-H(6A)  | 109.5     |
| C(5)-S(10)-Au(5)#1  | 105.3(13) | C(66)-C(6)-H(6B) | 109.5     |
| C(5)-S(10)-Au(2)    | 108.1(12) | S(6)-C(6)-H(6B)  | 109.5     |
| Au(5)#1-S(10)-Au(2) | 88.3(3)   | H(6A)-C(6)-H(6B) | 108.1     |
| C(24)-C(1)-S(4)     | 102.5(19) | C(36)-C(7)-S(7)  | 105(2)    |
| C(24)-C(1)-H(1A)    | 111.3     | C(36)-C(7)-H(7A) | 110.7     |
| S(4)-C(1)-H(1A)     | 111.3     | S(7)-C(7)-H(7A)  | 110.7     |
| C(24)-C(1)-H(1B)    | 111.3     | C(36)-C(7)-H(7B) | 110.7     |
| S(4)-C(1)-H(1B)     | 111.3     | S(7)-C(7)-H(7B)  | 110.7     |
| H(1A)-C(1)-H(1B)    | 109.2     | H(7A)-C(7)-H(7B) | 108.8     |
| C(30)-C(2)-S(8)     | 121(2)    | C(42)-C(8)-S(1)  | 113(3)    |
| C(30)-C(2)-H(2A)    | 107.2     | C(42)-C(8)-H(8A) | 109.1     |
| S(8)-C(2)-H(2A)     | 107.2     | S(1)-C(8)-H(8A)  | 109.1     |
| C(30)-C(2)-H(2B)    | 107.2     | C(42)-C(8)-H(8B) | 109.1     |
| S(8)-C(2)-H(2B)     | 107.2     | S(1)-C(8)-H(8B)  | 109.1     |

|                     |           |                    |           |
|---------------------|-----------|--------------------|-----------|
| H(8A)-C(8)-H(8B)    | 107.8     | C(18)-C(19)-H(19A) | 119.9     |
| C(12)-C(9)-S(2)     | 110(2)    | C(21)-C(20)-C(19)  | 120.1(16) |
| C(12)-C(9)-H(9A)    | 109.6     | C(21)-C(20)-H(20A) | 119.9     |
| S(2)-C(9)-H(9A)     | 109.6     | C(19)-C(20)-H(20A) | 119.9     |
| C(12)-C(9)-H(9B)    | 109.6     | C(20)-C(21)-C(22)  | 119.9(16) |
| S(2)-C(9)-H(9B)     | 109.6     | C(20)-C(21)-C(115) | 117(4)    |
| H(9A)-C(9)-H(9B)    | 108.1     | C(22)-C(21)-C(115) | 123(4)    |
| C(18)-C(10)-S(9)    | 112(3)    | C(23)-C(22)-C(21)  | 119.9(17) |
| C(18)-C(10)-H(10A)  | 109.2     | C(23)-C(22)-H(22A) | 120.0     |
| S(9)-C(10)-H(10A)   | 109.2     | C(21)-C(22)-H(22A) | 120.0     |
| C(18)-C(10)-H(10B)  | 109.2     | C(22)-C(23)-C(18)  | 120.0(16) |
| S(9)-C(10)-H(10B)   | 109.2     | C(22)-C(23)-H(23A) | 120.0     |
| H(10A)-C(10)-H(10B) | 107.9     | C(18)-C(23)-H(23A) | 120.0     |
| C(13)-C(12)-C(17)   | 120.2(16) | C(35)-C(30)-C(31)  | 119.8(16) |
| C(13)-C(12)-C(9)    | 118(3)    | C(35)-C(30)-C(2)   | 122(3)    |
| C(17)-C(12)-C(9)    | 122(3)    | C(31)-C(30)-C(2)   | 118(3)    |
| C(12)-C(13)-C(14)   | 120.3(16) | C(32)-C(31)-C(30)  | 119.7(16) |
| C(12)-C(13)-H(13D)  | 119.9     | C(32)-C(31)-H(31A) | 120.1     |
| C(14)-C(13)-H(13D)  | 119.9     | C(30)-C(31)-H(31A) | 120.1     |
| C(15)-C(14)-C(13)   | 119.2(16) | C(31)-C(32)-C(33)  | 120.5(16) |
| C(15)-C(14)-H(14A)  | 120.4     | C(31)-C(32)-H(32A) | 119.7     |
| C(13)-C(14)-H(14A)  | 120.4     | C(33)-C(32)-H(32A) | 119.7     |
| C(16)-C(15)-C(14)   | 120.6(16) | C(32)-C(33)-C(34)  | 120.0(16) |
| C(16)-C(15)-C(131)  | 118(4)    | C(32)-C(33)-C(76)  | 118(3)    |
| C(14)-C(15)-C(131)  | 121(4)    | C(34)-C(33)-C(76)  | 122(3)    |
| C(15)-C(16)-C(17)   | 120.2(16) | C(33)-C(34)-C(35)  | 119.3(16) |
| C(15)-C(16)-H(16A)  | 119.9     | C(33)-C(34)-H(34A) | 120.4     |
| C(17)-C(16)-H(16A)  | 119.9     | C(35)-C(34)-H(34A) | 120.4     |
| C(16)-C(17)-C(12)   | 119.3(16) | C(30)-C(35)-C(34)  | 120.5(15) |
| C(16)-C(17)-H(17A)  | 120.3     | C(30)-C(35)-H(35A) | 119.8     |
| C(12)-C(17)-H(17A)  | 120.3     | C(34)-C(35)-H(35A) | 119.8     |
| C(19)-C(18)-C(23)   | 119.5(16) | C(49)-C(48)-C(53)  | 119.1(15) |
| C(19)-C(18)-C(10)   | 117(3)    | C(49)-C(48)-C(5)   | 118(3)    |
| C(23)-C(18)-C(10)   | 124(3)    | C(53)-C(48)-C(5)   | 123(3)    |
| C(20)-C(19)-C(18)   | 120.2(16) | C(48)-C(49)-C(50)  | 120.1(16) |
| C(20)-C(19)-H(19A)  | 119.9     | C(48)-C(49)-H(49A) | 120.0     |

|                    |           |                    |           |
|--------------------|-----------|--------------------|-----------|
| C(50)-C(49)-H(49A) | 120.0     | C(62)-C(61)-H(61A) | 119.4     |
| C(51)-C(50)-C(49)  | 120.8(16) | C(61)-C(62)-C(63)  | 119.5(15) |
| C(51)-C(50)-H(50A) | 119.6     | C(61)-C(62)-H(62A) | 120.3     |
| C(49)-C(50)-H(50A) | 119.6     | C(63)-C(62)-H(62A) | 120.3     |
| C(50)-C(51)-C(52)  | 118.8(16) | C(64)-C(63)-C(62)  | 119.0(15) |
| C(50)-C(51)-C(107) | 125(4)    | C(64)-C(63)-C(72)  | 122(3)    |
| C(52)-C(51)-C(107) | 116(4)    | C(62)-C(63)-C(72)  | 119(3)    |
| C(53)-C(52)-C(51)  | 120.1(16) | C(65)-C(64)-C(63)  | 121.2(15) |
| C(53)-C(52)-H(52A) | 120.0     | C(65)-C(64)-H(64A) | 119.4     |
| C(51)-C(52)-H(52A) | 120.0     | C(63)-C(64)-H(64A) | 119.4     |
| C(52)-C(53)-C(48)  | 121.0(16) | C(64)-C(65)-C(60)  | 119.8(15) |
| C(52)-C(53)-H(53A) | 119.5     | C(64)-C(65)-H(65A) | 120.1     |
| C(48)-C(53)-H(53A) | 119.5     | C(60)-C(65)-H(65A) | 120.1     |
| C(59)-C(54)-C(55)  | 119.0(15) | C(67)-C(66)-C(71)  | 120.3(16) |
| C(59)-C(54)-C(3)   | 119(3)    | C(67)-C(66)-C(6)   | 115(3)    |
| C(55)-C(54)-C(3)   | 121(3)    | C(71)-C(66)-C(6)   | 124(3)    |
| C(54)-C(55)-C(56)  | 121.0(15) | C(66)-C(67)-C(68)  | 119.7(16) |
| C(54)-C(55)-H(55A) | 119.5     | C(66)-C(67)-H(67A) | 120.1     |
| C(56)-C(55)-H(55A) | 119.5     | C(68)-C(67)-H(67A) | 120.1     |
| C(55)-C(56)-C(57)  | 119.8(15) | C(69)-C(68)-C(67)  | 119.5(16) |
| C(55)-C(56)-H(56A) | 120.1     | C(69)-C(68)-H(68A) | 120.2     |
| C(57)-C(56)-H(56A) | 120.1     | C(67)-C(68)-H(68A) | 120.2     |
| C(58)-C(57)-C(56)  | 118.7(15) | C(70)-C(69)-C(68)  | 120.4(16) |
| C(58)-C(57)-C(101) | 122(3)    | C(70)-C(69)-C(88)  | 124(3)    |
| C(56)-C(57)-C(101) | 120(3)    | C(68)-C(69)-C(88)  | 116(3)    |
| C(57)-C(58)-C(59)  | 121.1(15) | C(69)-C(70)-C(71)  | 120.1(16) |
| C(57)-C(58)-H(58A) | 119.4     | C(69)-C(70)-H(70A) | 120.0     |
| C(59)-C(58)-H(58A) | 119.4     | C(71)-C(70)-H(70A) | 120.0     |
| C(54)-C(59)-C(58)  | 120.1(15) | C(66)-C(71)-C(70)  | 119.8(16) |
| C(54)-C(59)-H(59A) | 120.0     | C(66)-C(71)-H(71A) | 120.1     |
| C(58)-C(59)-H(59A) | 120.0     | C(70)-C(71)-H(71A) | 120.1     |
| C(61)-C(60)-C(65)  | 119.3(14) | C(73)-C(72)-C(74)  | 98(4)     |
| C(61)-C(60)-C(4)   | 124(2)    | C(73)-C(72)-C(75)  | 127(5)    |
| C(65)-C(60)-C(4)   | 117(2)    | C(74)-C(72)-C(75)  | 110(4)    |
| C(60)-C(61)-C(62)  | 121.2(15) | C(73)-C(72)-C(63)  | 103(4)    |
| C(60)-C(61)-H(61A) | 119.4     | C(74)-C(72)-C(63)  | 111(4)    |

|                     |        |                     |       |
|---------------------|--------|---------------------|-------|
| C(75)-C(72)-C(63)   | 108(4) | H(78B)-C(78)-H(78C) | 109.5 |
| C(72)-C(73)-H(73A)  | 109.5  | C(76)-C(79)-H(79A)  | 109.5 |
| C(72)-C(73)-H(73B)  | 109.5  | C(76)-C(79)-H(79B)  | 109.5 |
| H(73A)-C(73)-H(73B) | 109.5  | H(79A)-C(79)-H(79B) | 109.5 |
| C(72)-C(73)-H(73C)  | 109.5  | C(76)-C(79)-H(79C)  | 109.5 |
| H(73A)-C(73)-H(73C) | 109.5  | H(79A)-C(79)-H(79C) | 109.5 |
| H(73B)-C(73)-H(73C) | 109.5  | H(79B)-C(79)-H(79C) | 109.5 |
| C(72)-C(74)-H(74A)  | 109.5  | C(107)-C(83)-H(83A) | 109.5 |
| C(72)-C(74)-H(74B)  | 109.5  | C(107)-C(83)-H(83B) | 109.5 |
| H(74A)-C(74)-H(74B) | 109.5  | H(83A)-C(83)-H(83B) | 109.5 |
| C(72)-C(74)-H(74C)  | 109.5  | C(107)-C(83)-H(83C) | 109.5 |
| H(74A)-C(74)-H(74C) | 109.5  | H(83A)-C(83)-H(83C) | 109.5 |
| H(74B)-C(74)-H(74C) | 109.5  | H(83B)-C(83)-H(83C) | 109.5 |
| C(72)-C(75)-H(75A)  | 109.5  | C(107)-C(84)-H(84A) | 109.5 |
| C(72)-C(75)-H(75B)  | 109.5  | C(107)-C(84)-H(84B) | 109.5 |
| H(75A)-C(75)-H(75B) | 109.5  | H(84A)-C(84)-H(84B) | 109.5 |
| C(72)-C(75)-H(75C)  | 109.5  | C(107)-C(84)-H(84C) | 109.5 |
| H(75A)-C(75)-H(75C) | 109.5  | H(84A)-C(84)-H(84C) | 109.5 |
| H(75B)-C(75)-H(75C) | 109.5  | H(84B)-C(84)-H(84C) | 109.5 |
| C(79)-C(76)-C(77)   | 108(5) | C(107)-C(85)-H(85A) | 109.5 |
| C(79)-C(76)-C(33)   | 113(5) | C(107)-C(85)-H(85B) | 109.5 |
| C(77)-C(76)-C(33)   | 124(5) | H(85A)-C(85)-H(85B) | 109.5 |
| C(79)-C(76)-C(78)   | 106(5) | C(107)-C(85)-H(85C) | 109.5 |
| C(77)-C(76)-C(78)   | 94(5)  | H(85A)-C(85)-H(85C) | 109.5 |
| C(33)-C(76)-C(78)   | 108(4) | H(85B)-C(85)-H(85C) | 109.5 |
| C(76)-C(77)-H(77A)  | 109.5  | C(88)-C(86)-H(86A)  | 109.5 |
| C(76)-C(77)-H(77B)  | 109.5  | C(88)-C(86)-H(86B)  | 109.5 |
| H(77A)-C(77)-H(77B) | 109.5  | H(86A)-C(86)-H(86B) | 109.5 |
| C(76)-C(77)-H(77C)  | 109.5  | C(88)-C(86)-H(86C)  | 109.5 |
| H(77A)-C(77)-H(77C) | 109.5  | H(86A)-C(86)-H(86C) | 109.5 |
| H(77B)-C(77)-H(77C) | 109.5  | H(86B)-C(86)-H(86C) | 109.5 |
| C(76)-C(78)-H(78A)  | 109.5  | C(88)-C(87)-H(87A)  | 109.5 |
| C(76)-C(78)-H(78B)  | 109.5  | C(88)-C(87)-H(87B)  | 109.5 |
| H(78A)-C(78)-H(78B) | 109.5  | H(87A)-C(87)-H(87B) | 109.5 |
| C(76)-C(78)-H(78C)  | 109.5  | C(88)-C(87)-H(87C)  | 109.5 |
| H(78A)-C(78)-H(78C) | 109.5  | H(87A)-C(87)-H(87C) | 109.5 |

|                      |        |                      |        |
|----------------------|--------|----------------------|--------|
| H(87B)-C(87)-H(87C)  | 109.5  | H(10J)-C(103)-H(10K) | 109.5  |
| C(87)-C(88)-C(104)   | 107(4) | C(85)-C(107)-C(84)   | 130(7) |
| C(87)-C(88)-C(86)    | 106(4) | C(85)-C(107)-C(83)   | 102(6) |
| C(104)-C(88)-C(86)   | 105(4) | C(84)-C(107)-C(83)   | 96(6)  |
| C(87)-C(88)-C(69)    | 109(5) | C(85)-C(107)-C(51)   | 105(6) |
| C(104)-C(88)-C(69)   | 112(6) | C(84)-C(107)-C(51)   | 117(6) |
| C(86)-C(88)-C(69)    | 118(7) | C(83)-C(107)-C(51)   | 102(5) |
| C(101)-C(91)-H(91A)  | 109.5  | C(118)-C(115)-C(117) | 116(3) |
| C(101)-C(91)-H(91B)  | 109.5  | C(118)-C(115)-C(116) | 116(3) |
| H(91A)-C(91)-H(91B)  | 109.5  | C(117)-C(115)-C(116) | 117(3) |
| C(101)-C(91)-H(91C)  | 109.5  | C(118)-C(115)-C(21)  | 114(7) |
| H(91A)-C(91)-H(91C)  | 109.5  | C(117)-C(115)-C(21)  | 94(7)  |
| H(91B)-C(91)-H(91C)  | 109.5  | C(116)-C(115)-C(21)  | 94(7)  |
| C(101)-C(102)-H(10C) | 109.5  | C(115)-C(116)-H(11A) | 109.5  |
| C(101)-C(102)-H(10D) | 109.5  | C(115)-C(116)-H(11B) | 109.5  |
| H(10C)-C(102)-H(10D) | 109.5  | H(11A)-C(116)-H(11B) | 109.5  |
| C(101)-C(102)-H(10E) | 109.5  | C(115)-C(116)-H(11C) | 109.4  |
| H(10C)-C(102)-H(10E) | 109.5  | H(11A)-C(116)-H(11C) | 109.5  |
| H(10D)-C(102)-H(10E) | 109.5  | H(11B)-C(116)-H(11C) | 109.5  |
| C(88)-C(104)-H(10F)  | 109.5  | C(115)-C(117)-H(11D) | 109.5  |
| C(88)-C(104)-H(10G)  | 109.5  | C(115)-C(117)-H(11E) | 109.5  |
| H(10F)-C(104)-H(10G) | 109.5  | H(11D)-C(117)-H(11E) | 109.5  |
| C(88)-C(104)-H(10H)  | 109.5  | C(115)-C(117)-H(11F) | 109.4  |
| H(10F)-C(104)-H(10H) | 109.5  | H(11D)-C(117)-H(11F) | 109.5  |
| H(10G)-C(104)-H(10H) | 109.5  | H(11E)-C(117)-H(11F) | 109.5  |
| C(91)-C(101)-C(102)  | 102(6) | C(115)-C(118)-H(11G) | 109.5  |
| C(91)-C(101)-C(103)  | 96(6)  | C(115)-C(118)-H(11H) | 109.5  |
| C(102)-C(101)-C(103) | 107(6) | H(11G)-C(118)-H(11H) | 109.5  |
| C(91)-C(101)-C(57)   | 116(6) | C(115)-C(118)-H(11I) | 109.4  |
| C(102)-C(101)-C(57)  | 117(5) | H(11G)-C(118)-H(11I) | 109.5  |
| C(103)-C(101)-C(57)  | 117(5) | H(11H)-C(118)-H(11I) | 109.5  |
| C(101)-C(103)-H(10I) | 109.5  | C(134)-C(131)-C(132) | 115(3) |
| C(101)-C(103)-H(10J) | 109.5  | C(134)-C(131)-C(133) | 115(3) |
| H(10I)-C(103)-H(10J) | 109.5  | C(132)-C(131)-C(133) | 115(3) |
| C(101)-C(103)-H(10K) | 109.5  | C(134)-C(131)-C(15)  | 104(5) |
| H(10I)-C(103)-H(10K) | 109.5  | C(132)-C(131)-C(15)  | 99(5)  |

|                      |        |                      |       |
|----------------------|--------|----------------------|-------|
| C(133)-C(131)-C(15)  | 105(7) | C(131)-C(133)-H(13J) | 109.5 |
| C(131)-C(132)-H(13E) | 109.5  | H(13H)-C(133)-H(13J) | 109.5 |
| C(131)-C(132)-H(13F) | 109.4  | H(13I)-C(133)-H(13J) | 109.5 |
| H(13E)-C(132)-H(13F) | 109.5  | C(131)-C(134)-H(13K) | 109.5 |
| C(131)-C(132)-H(13G) | 109.5  | C(131)-C(134)-H(13L) | 109.4 |
| H(13E)-C(132)-H(13G) | 109.5  | H(13K)-C(134)-H(13L) | 109.5 |
| H(13F)-C(132)-H(13G) | 109.5  | C(131)-C(134)-H(13M) | 109.5 |
| C(131)-C(133)-H(13H) | 109.5  | H(13K)-C(134)-H(13M) | 109.5 |
| C(131)-C(133)-H(13I) | 109.4  | H(13L)-C(134)-H(13M) | 109.5 |
| H(13H)-C(133)-H(13I) | 109.5  |                      |       |

---

Symmetry transformations used to generate equivalent atoms:

#1 -x+1,-y+1,-z

**Table S4.** Anisotropic displacement parameters ( $\text{\AA}^2 \times 10^3$ ) for  $\text{Au}_{24}(\text{SR})_{20}$ . The anisotropic displacement factor exponent takes the form:  $-2\pi^2 [ h^2 a^{*2} U^{11} + \dots + 2 h k a^* b^* U^{12} ]$

|        | $U^{11}$ | $U^{22}$ | $U^{33}$ | $U^{23}$ | $U^{13}$ | $U^{12}$ |
|--------|----------|----------|----------|----------|----------|----------|
| C(24)  | 80(20)   | 100(20)  | 100(20)  | -29(18)  | 6(18)    | -16(18)  |
| C(25)  | 160(40)  | 170(40)  | 170(40)  | -130(30) | 20(30)   | -40(30)  |
| C(26)  | 250(60)  | 120(40)  | 220(60)  | -90(40)  | 50(50)   | -40(40)  |
| C(27)  | 380(90)  | 110(30)  | 80(30)   | -50(20)  | 30(40)   | -40(40)  |
| C(28)  | 200(50)  | 300(70)  | 140(40)  | -140(50) | 10(30)   | -60(50)  |
| C(29)  | 140(30)  | 170(40)  | 120(30)  | -80(30)  | 0(20)    | -50(30)  |
| C(42)  | 230(40)  | 190(40)  | 130(30)  | -40(30)  | -40(30)  | -90(30)  |
| C(43)  | 240(40)  | 180(40)  | 160(30)  | 0(30)    | -50(30)  | -70(30)  |
| C(44)  | 280(40)  | 230(40)  | 180(30)  | 0(30)    | -60(30)  | -50(40)  |
| C(45)  | 300(40)  | 260(40)  | 190(40)  | 0(40)    | -50(30)  | -10(40)  |
| C(46)  | 300(40)  | 220(40)  | 130(30)  | -20(30)  | -40(30)  | -30(40)  |
| C(47)  | 270(40)  | 180(40)  | 120(30)  | 0(30)    | -30(30)  | -60(40)  |
| C(36)  | 140(30)  | 140(30)  | 140(30)  | 50(20)   | -40(20)  | -70(20)  |
| C(37)  | 200(40)  | 190(30)  | 150(30)  | 50(30)   | -10(30)  | -70(30)  |
| C(38)  | 250(40)  | 220(40)  | 160(30)  | 40(30)   | 0(30)    | -80(40)  |
| C(39)  | 250(40)  | 170(30)  | 180(40)  | 70(30)   | -10(30)  | -90(30)  |
| C(40)  | 210(40)  | 160(30)  | 230(40)  | 50(30)   | -20(30)  | -40(30)  |
| C(41)  | 180(30)  | 130(30)  | 230(40)  | 30(30)   | -10(30)  | -40(30)  |
| Au(1)  | 95(1)    | 67(1)    | 73(1)    | -15(1)   | -19(1)   | -22(1)   |
| Au(2)  | 86(1)    | 62(1)    | 76(1)    | -8(1)    | -21(1)   | -19(1)   |
| Au(3)  | 89(1)    | 79(1)    | 79(1)    | -11(1)   | -16(1)   | -18(1)   |
| Au(4)  | 81(1)    | 74(1)    | 93(1)    | -17(1)   | -15(1)   | -17(1)   |
| Au(5)  | 91(1)    | 72(1)    | 83(1)    | -7(1)    | -9(1)    | -23(1)   |
| Au(6)  | 90(1)    | 70(1)    | 70(1)    | -7(1)    | -17(1)   | -25(1)   |
| Au(7)  | 96(1)    | 75(1)    | 71(1)    | -7(1)    | -14(1)   | -22(1)   |
| Au(8)  | 84(1)    | 74(1)    | 83(1)    | -11(1)   | -20(1)   | -23(1)   |
| Au(9)  | 106(1)   | 90(1)    | 80(1)    | -19(1)   | -15(1)   | -21(1)   |
| Au(10) | 107(1)   | 109(1)   | 86(1)    | -19(1)   | -13(1)   | -32(1)   |
| Au(11) | 124(1)   | 97(1)    | 85(1)    | -25(1)   | -8(1)    | -30(1)   |
| Au(12) | 96(1)    | 114(1)   | 97(1)    | -37(1)   | -12(1)   | -34(1)   |
| S(1)   | 120(7)   | 129(7)   | 104(6)   | -37(5)   | -8(5)    | -37(6)   |



|       |          |          |         |         |         |         |
|-------|----------|----------|---------|---------|---------|---------|
| S(2)  | 92(5)    | 80(4)    | 80(4)   | -13(3)  | -12(4)  | -22(4)  |
| S(3)  | 84(5)    | 114(6)   | 97(5)   | -28(4)  | -26(4)  | -29(4)  |
| S(4)  | 99(5)    | 91(5)    | 75(4)   | -27(4)  | -17(4)  | -22(4)  |
| S(5)  | 91(5)    | 87(5)    | 86(5)   | -15(4)  | -17(4)  | -20(4)  |
| S(6)  | 127(7)   | 106(6)   | 83(5)   | -16(4)  | -10(5)  | -30(5)  |
| S(7)  | 113(6)   | 125(7)   | 94(6)   | -32(5)  | -15(5)  | -37(5)  |
| S(8)  | 103(6)   | 86(5)    | 95(5)   | -11(4)  | -16(4)  | -23(4)  |
| S(9)  | 107(6)   | 108(6)   | 74(5)   | -9(4)   | -18(4)  | -33(5)  |
| S(10) | 97(5)    | 73(4)    | 95(5)   | -15(4)  | -14(4)  | -23(4)  |
| C(1)  | 130(30)  | 78(19)   | 100(20) | -17(16) | -2(19)  | -25(18) |
| C(2)  | 110(30)  | 90(20)   | 120(30) | 0(20)   | -20(20) | -8(19)  |
| C(3)  | 120(30)  | 150(30)  | 100(20) | -60(20) | 10(20)  | -50(20) |
| C(4)  | 71(17)   | 82(18)   | 100(20) | -39(16) | -1(15)  | -7(15)  |
| C(5)  | 110(30)  | 63(19)   | 160(30) | 9(19)   | -10(20) | -27(19) |
| C(6)  | 170(30)  | 140(30)  | 80(20)  | -30(20) | -40(20) | -60(30) |
| C(7)  | 140(30)  | 110(30)  | 90(20)  | -26(19) | -10(20) | -40(20) |
| C(8)  | 170(40)  | 150(40)  | 100(30) | -40(30) | 0(30)   | -60(30) |
| C(9)  | 110(20)  | 140(30)  | 80(20)  | -9(18)  | 0(17)   | -70(20) |
| C(10) | 140(30)  | 150(30)  | 90(30)  | -30(20) | -30(20) | -10(30) |
| C(12) | 120(30)  | 110(30)  | 100(20) | -10(20) | 20(20)  | -50(30) |
| C(13) | 170(40)  | 90(30)   | 190(40) | 20(30)  | -80(30) | -40(30) |
| C(14) | 340(90)  | 110(40)  | 190(50) | 0(30)   | -80(50) | -90(50) |
| C(15) | 280(70)  | 60(20)   | 110(30) | 30(20)  | 10(40)  | 10(30)  |
| C(16) | 200(50)  | 70(30)   | 240(60) | 30(30)  | 0(40)   | -30(30) |
| C(17) | 120(40)  | 150(40)  | 180(40) | 50(30)  | -30(30) | -40(30) |
| C(18) | 140(30)  | 140(40)  | 90(30)  | 0(20)   | -50(30) | 10(30)  |
| C(19) | 310(70)  | 160(50)  | 100(30) | 10(30)  | -50(40) | 0(50)   |
| C(20) | 290(80)  | 270(80)  | 120(50) | 30(50)  | -20(50) | -80(60) |
| C(21) | 330(90)  | 300(100) | 80(40)  | 30(50)  | 40(50)  | -30(70) |
| C(22) | 410(100) | 150(50)  | 110(40) | 30(30)  | -20(50) | 20(60)  |
| C(23) | 190(40)  | 160(40)  | 80(30)  | -10(30) | 0(30)   | 20(30)  |
| C(30) | 89(18)   | 90(20)   | 160(30) | -29(18) | -18(16) | -7(16)  |
| C(31) | 93(16)   | 100(20)  | 210(30) | -70(20) | -1(19)  | -8(17)  |
| C(32) | 110(20)  | 140(30)  | 220(30) | -90(20) | 10(20)  | -20(20) |
| C(33) | 130(20)  | 110(20)  | 200(30) | -60(20) | 0(20)   | -30(20) |
| C(34) | 120(19)  | 100(20)  | 190(30) | -43(19) | -20(20) | -30(20) |

|       |         |         |         |         |         |         |
|-------|---------|---------|---------|---------|---------|---------|
| C(35) | 93(18)  | 90(20)  | 180(30) | -36(18) | -17(19) | -8(16)  |
| C(48) | 100(20) | 100(30) | 110(30) | -20(20) | 10(20)  | -50(20) |
| C(49) | 100(30) | 110(30) | 150(40) | 10(20)  | -20(30) | -10(20) |
| C(50) | 170(50) | 170(50) | 130(40) | -30(40) | -20(30) | 0(40)   |
| C(51) | 180(40) | 110(30) | 120(30) | 10(30)  | -20(30) | 20(30)  |
| C(52) | 240(60) | 120(40) | 160(50) | -40(30) | 30(40)  | -70(40) |
| C(53) | 160(40) | 70(20)  | 170(40) | -30(30) | -30(30) | -20(20) |
| C(54) | 100(20) | 100(20) | 110(30) | -55(19) | -30(20) | -16(19) |
| C(55) | 100(30) | 200(40) | 120(30) | -50(30) | 0(30)   | -50(30) |
| C(56) | 110(30) | 190(40) | 120(30) | -50(30) | -30(20) | -40(30) |
| C(57) | 110(30) | 180(40) | 100(30) | -70(30) | 20(20)  | -60(30) |
| C(58) | 60(20)  | 270(50) | 130(30) | -90(30) | 0(20)   | -70(30) |
| C(59) | 110(30) | 160(30) | 130(30) | -50(30) | -30(20) | -60(30) |
| C(60) | 77(19)  | 90(20)  | 80(20)  | -7(16)  | -13(15) | -22(17) |
| C(61) | 100(20) | 140(30) | 110(30) | -70(30) | -10(20) | 10(20)  |
| C(62) | 90(20)  | 100(30) | 170(40) | -60(30) | -30(30) | 20(20)  |
| C(63) | 120(30) | 130(30) | 110(30) | -10(20) | -40(20) | -30(30) |
| C(64) | 150(30) | 120(30) | 80(20)  | -30(20) | -10(20) | -50(30) |
| C(65) | 110(20) | 80(20)  | 110(20) | -12(17) | -30(20) | -39(18) |
| C(66) | 180(30) | 140(30) | 90(20)  | -20(20) | -30(20) | -60(30) |
| C(67) | 210(40) | 220(40) | 120(30) | 10(30)  | -20(30) | -50(30) |
| C(68) | 220(40) | 210(40) | 110(30) | 0(30)   | -30(30) | -30(30) |
| C(69) | 200(40) | 150(30) | 80(20)  | -50(20) | 20(20)  | -40(30) |
| C(70) | 170(30) | 180(30) | 110(30) | -20(20) | -10(20) | -20(30) |
| C(71) | 170(30) | 160(30) | 130(30) | -30(20) | -20(30) | -30(30) |

---

**Table S5.** Hydrogen coordinates ( $\times 10^4$ ) and isotropic displacement parameters ( $\text{\AA}^2 \times 10^{-3}$ ) for  $\text{Au}_{24}(\text{SR})_{20}$ .

|        | x     | y    | z    | U(eq) |
|--------|-------|------|------|-------|
| H(25A) | 1799  | 6583 | 2258 | 180   |
| H(26A) | 1502  | 6788 | 3253 | 242   |
| H(28A) | 3802  | 7351 | 2769 | 237   |
| H(29A) | 4090  | 7167 | 1771 | 164   |
| H(12A) | 2972  | 8068 | 3432 | 622   |
| H(12B) | 2251  | 8049 | 4089 | 622   |
| H(12C) | 1962  | 8247 | 3394 | 622   |
| H(12D) | 3544  | 6638 | 4106 | 738   |
| H(12E) | 2775  | 6234 | 4330 | 738   |
| H(12F) | 2770  | 6719 | 4710 | 738   |
| H(13A) | 1337  | 7234 | 4608 | 963   |
| H(13B) | 1378  | 6691 | 4285 | 963   |
| H(13C) | 1036  | 7473 | 3911 | 963   |
| H(43A) | 294   | 3670 | 4734 | 244   |
| H(44A) | 959   | 2545 | 5171 | 296   |
| H(46A) | -287  | 2046 | 4158 | 286   |
| H(47A) | -930  | 3163 | 3708 | 249   |
| H(12G) | 1037  | 1168 | 4169 | 750   |
| H(12H) | 1705  | 676  | 4649 | 750   |
| H(12I) | 1843  | 1424 | 4200 | 750   |
| H(12J) | -267  | 1047 | 5377 | 786   |
| H(12K) | -2    | 1268 | 5891 | 786   |
| H(12L) | 500   | 576  | 5770 | 786   |
| H(12M) | 1835  | 847  | 5614 | 815   |
| H(12N) | 1281  | 1497 | 5799 | 815   |
| H(12O) | 2012  | 1578 | 5140 | 815   |
| H(37A) | -2113 | 3570 | 2600 | 258   |
| H(38A) | -2620 | 2756 | 3577 | 295   |
| H(40A) | -792  | 1317 | 3020 | 291   |
| H(41A) | -270  | 2124 | 2058 | 260   |

|        |       |      |       |     |
|--------|-------|------|-------|-----|
| H(12P) | -909  | 786  | 4230  | 600 |
| H(12Q) | -1623 | 691  | 4899  | 600 |
| H(12R) | -1199 | 1346 | 4577  | 600 |
| H(12S) | -2277 | 805  | 3615  | 771 |
| H(12T) | -3113 | 1380 | 3699  | 771 |
| H(12U) | -2897 | 723  | 4326  | 771 |
| H(12V) | -3050 | 1382 | 4962  | 636 |
| H(12W) | -3332 | 2006 | 4330  | 636 |
| H(12X) | -2594 | 2019 | 4670  | 636 |
| H(1A)  | 3281  | 7051 | 817   | 129 |
| H(1B)  | 2481  | 6663 | 1185  | 129 |
| H(2A)  | 2159  | 8104 | -1338 | 144 |
| H(2B)  | 1271  | 7841 | -1037 | 144 |
| H(3A)  | 2759  | 3827 | -364  | 143 |
| H(3B)  | 1926  | 3808 | -598  | 143 |
| H(4A)  | 116   | 5505 | 1023  | 103 |
| H(4B)  | -361  | 5706 | 1670  | 103 |
| H(5A)  | 4235  | 2665 | 1404  | 152 |
| H(5B)  | 3923  | 2381 | 959   | 152 |
| H(6A)  | 3013  | 4976 | 3934  | 153 |
| H(6B)  | 2040  | 5347 | 3822  | 153 |
| H(7A)  | -1258 | 3965 | 1678  | 141 |
| H(7B)  | -840  | 3505 | 1215  | 141 |
| H(8A)  | -937  | 4475 | 4265  | 170 |
| H(8B)  | -1470 | 4274 | 3889  | 170 |
| H(9A)  | 2471  | 3212 | 2992  | 134 |
| H(9B)  | 1585  | 3234 | 2797  | 134 |
| H(10A) | 6086  | 3066 | 1978  | 161 |
| H(10B) | 6409  | 3424 | 2348  | 161 |
| H(13D) | 1396  | 2319 | 2561  | 188 |
| H(14A) | 1785  | 1158 | 2684  | 253 |
| H(16A) | 4073  | 1023 | 3189  | 246 |
| H(17A) | 3698  | 2182 | 3055  | 213 |
| H(19A) | 6173  | 2009 | 2882  | 257 |
| H(20A) | 5587  | 1316 | 3933  | 307 |
| H(22A) | 4002  | 2968 | 4324  | 328 |

|        |       |      |       |     |
|--------|-------|------|-------|-----|
| H(23A) | 4478  | 3648 | 3230  | 205 |
| H(31A) | 413   | 7938 | -73   | 166 |
| H(32A) | 113   | 8351 | 806   | 188 |
| H(34A) | 2570  | 8705 | 319   | 167 |
| H(35A) | 2875  | 8289 | -566  | 156 |
| H(49A) | 5336  | 2017 | 2008  | 164 |
| H(50A) | 6352  | 1014 | 2373  | 206 |
| H(52A) | 6044  | 403  | 952   | 220 |
| H(53A) | 5066  | 1418 | 569   | 171 |
| H(55A) | 1699  | 4614 | -1799 | 169 |
| H(56A) | 2421  | 4926 | -2912 | 166 |
| H(58A) | 4719  | 4446 | -2289 | 172 |
| H(59A) | 3989  | 4167 | -1178 | 153 |
| H(61A) | -1014 | 6988 | 1479  | 141 |
| H(62A) | -1748 | 7981 | 774   | 149 |
| H(64A) | -657  | 7289 | -774  | 139 |
| H(65A) | 29    | 6287 | -62   | 118 |
| H(67A) | 3301  | 3950 | 4825  | 245 |
| H(68A) | 2856  | 3255 | 5936  | 239 |
| H(70A) | 341   | 4237 | 5845  | 204 |
| H(71A) | 769   | 4885 | 4722  | 193 |
| H(73A) | -2708 | 8514 | -1128 | 356 |
| H(73B) | -2736 | 7866 | -466  | 356 |
| H(73C) | -1958 | 7855 | -1086 | 356 |
| H(74A) | -1535 | 9125 | -1489 | 341 |
| H(74B) | -990  | 8385 | -1447 | 341 |
| H(74C) | -726  | 8807 | -1111 | 341 |
| H(75A) | -2515 | 9354 | -446  | 286 |
| H(75B) | -1713 | 9033 | -61   | 286 |
| H(75C) | -2589 | 8743 | 246   | 286 |
| H(77A) | 311   | 8920 | 2135  | 419 |
| H(77B) | 620   | 8180 | 2089  | 419 |
| H(77C) | -176  | 8691 | 1751  | 419 |
| H(78A) | 241   | 9851 | 1309  | 387 |
| H(78B) | -117  | 9610 | 857   | 387 |
| H(78C) | 722   | 9946 | 557   | 387 |

|        |      |      |       |     |
|--------|------|------|-------|-----|
| H(79A) | 1554 | 9207 | 1727  | 365 |
| H(79B) | 2063 | 9322 | 978   | 365 |
| H(79C) | 2154 | 8581 | 1519  | 365 |
| H(83A) | 8373 | -277 | 2121  | 411 |
| H(83B) | 7702 | 317  | 2345  | 411 |
| H(83C) | 8100 | 439  | 1574  | 411 |
| H(84A) | 7979 | -844 | 1564  | 484 |
| H(84B) | 7866 | -99  | 1028  | 484 |
| H(84C) | 7155 | -544 | 1202  | 484 |
| H(85A) | 7139 | -915 | 2751  | 424 |
| H(85B) | 6166 | -582 | 2625  | 424 |
| H(85C) | 6672 | -209 | 2853  | 424 |
| H(86A) | 1087 | 2172 | 7175  | 632 |
| H(86B) | 1821 | 2245 | 6519  | 632 |
| H(86C) | 817  | 2511 | 6459  | 632 |
| H(87A) | 297  | 3025 | 7447  | 324 |
| H(87B) | 32   | 3459 | 6735  | 324 |
| H(87C) | 475  | 3773 | 7074  | 324 |
| H(91A) | 4256 | 4963 | -4345 | 533 |
| H(91B) | 3288 | 4945 | -3927 | 533 |
| H(91C) | 4047 | 4295 | -3743 | 533 |
| H(10C) | 5286 | 5044 | -4066 | 403 |
| H(10D) | 5283 | 4387 | -3413 | 403 |
| H(10E) | 5286 | 5092 | -3366 | 403 |
| H(10F) | 1711 | 2632 | 7553  | 545 |
| H(10G) | 1873 | 3386 | 7189  | 545 |
| H(10H) | 2474 | 2799 | 6920  | 545 |
| H(10I) | 4136 | 5890 | -4282 | 454 |
| H(10J) | 3913 | 6043 | -3603 | 454 |
| H(10K) | 3185 | 5871 | -3833 | 454 |
| H(11A) | 4404 | 1695 | 5813  | 750 |
| H(11B) | 4213 | 2373 | 5200  | 750 |
| H(11C) | 5179 | 1933 | 5213  | 750 |
| H(11D) | 3172 | 1398 | 5321  | 946 |
| H(11E) | 3502 | 1524 | 4543  | 946 |
| H(11F) | 3254 | 2140 | 4813  | 946 |

|        |      |      |      |     |
|--------|------|------|------|-----|
| H(11G) | 4655 | 587  | 5586 | 661 |
| H(11H) | 5485 | 848  | 5069 | 661 |
| H(11I) | 4779 | 671  | 4821 | 661 |
| H(13E) | 2661 | -529 | 3613 | 565 |
| H(13F) | 2063 | 193  | 3321 | 565 |
| H(13G) | 2573 | 56   | 3896 | 565 |
| H(13H) | 4269 | -515 | 3313 | 684 |
| H(13I) | 3955 | 35   | 3674 | 684 |
| H(13J) | 4467 | 226  | 2921 | 684 |
| H(13K) | 3508 | -344 | 2462 | 481 |
| H(13L) | 3755 | 384  | 2106 | 481 |
| H(13M) | 2757 | 316  | 2308 | 481 |

---
